# Supplementary material for: Organ-specific genome diversity of replication-competent SARS-CoV-2
Source: PubMed Central journal article supplement (PMC8595628; doi:10.1038/s41467-021-26884-7), 2021-11-16
Supplement: 41467_2021_26884_MOESM1_ESM.pdf [file 41467_2021_26884_MOESM1_ESM.pdf]

## Supplementary Information

### Organ-specific genome diversity of replication-competent SARS-CoV-2

Jolien Van Cleemput, Willem van Snippenberg, Laurens Lambrechts, Amélie Dendooven, Valentino D'Onofrio, Liesbeth Couck, Wim Trypsteen, Jan Vanrusselt, Sebastiaan Theuns, Nick Vereecke, Thierry P.P. van den Bosch, Martin Lammens, Ann Driessen, Ruth Achten, Ken R. Bracke, Wim Van den Broeck, Jan Von der Thüsen, Hans Nauwynck, Jo Van Dorpe, Sarah Gerlo, Piet Maes, Janneke Cox, Lino Vandekerckhove

Supplementary Table 1

| Case ID | Duration of disease in days | CCI     | CCI subcategories |      |      |      |      |      |      |      |      |          |       | Invasive O <sub>2</sub> | Immuno-suppressive therapy | Antiviral treatment        | Viral RNA in lungs | RNAemia    | Viral RNA in extrap organs |   |
|---------|-----------------------------|---------|-------------------|------|------|------|------|------|------|------|------|----------|-------|-------------------------|----------------------------|----------------------------|--------------------|------------|----------------------------|---|
|         |                             |         | CVD               | CA   | Str  | HP   | Dem  | Dep  | DPD  | CKD  | Diab | Dysl /Ob | Lymph |                         |                            |                            |                    |            |                            |   |
| 01      | 21 (L)                      | 3       | 1                 | 0    | 0    | 0    | 0    | 0    | 0    | 1    | 0    | 0        | 1     | 0                       | Y                          | N                          | N                  | Y          | Y                          | N |
| 02      | 51 (L)                      | 4       | 1                 | 1    | 1    | 1    | 0    | 0    | 0    | 0    | 0    | 0        | 0     | 0                       | Y                          | N                          | N                  | N          | N                          | N |
| 03      | 41 (L)                      | 4       | 1                 | 0    | 0    | 0    | 1    | 0    | 1    | 1    | 0    | 0        | 0     | N                       | N                          | N                          | N                  | Y          | N                          |   |
| 04      | 8 (S)                       | 2       | 1                 | 0    | 0    | 0    | 0    | 0    | 0    | 1    | 0    | 0        | 0     | N                       | Y, mild <sup>1</sup>       | N                          | Y                  | Y          | N                          |   |
| 05      | 27 (L)                      | 2       | 1                 | 0    | 0    | 0    | 0    | 0    | 0    | 1    | 0    | 0        | 0     | N                       | N                          | N                          | Y                  | Y          | N                          |   |
| 06      | 18 (S)                      | 3       | 1                 | 0    | 0    | 0    | 0    | 0    | 1    | 0    | 0    | 0        | 1     | N                       | Y, severe <sup>2</sup>     | N                          | Y                  | Y          | Y                          |   |
| 07      | 3 (S)                       | 1       | 0                 | 0    | 0    | 0    | 0    | 0    | 1    | 0    | 0    | 0        | 0     | N                       | Y, severe <sup>3</sup>     | N                          | Y                  | Y          | Y                          |   |
| 08      | 18 (S)                      | 4       | 1                 | 1    | 0    | 0    | 0    | 1    | 0    | 1    | 0    | 0        | 0     | N                       | N                          | N                          | Y                  | N          | N                          |   |
| 09      | 32 (L)                      | 4       | 1                 | 1    | 0    | 0    | 0    | 0    | 1    | 1    | 0    | 0        | 0     | N                       | N                          | N                          | N                  | Y          | N                          |   |
| 10      | 28 (L)                      | 4       | 1                 | 1    | 0    | 0    | 0    | 0    | 0    | 1    | 0    | 1        | 0     | N                       | N                          | N                          | N                  | N          | N                          |   |
| 11      | >22 (L)                     | 6       | 1                 | 0    | 1    | 1    | 0    | 0    | 0    | 1    | 1    | 1        | 0     | N                       | N                          | N                          | Y                  | N          | N                          |   |
| 12      | 12 (S)                      | 1       | 1                 | 0    | 0    | 0    | 0    | 0    | 0    | 0    | 0    | 0        | 0     | N                       | N                          | N                          | Y                  | Y          | N                          |   |
| 13      | 88 (L)                      | 1       | 0                 | 0    | 0    | 0    | 0    | 0    | 0    | 0    | 0    | 0        | 1     | Y                       | Y, severe <sup>4</sup>     | Y, remdesivir <sup>5</sup> | Y                  | Y          | Y                          |   |
| Summary | 22 [18-32]                  | 3 [2-4] | 11/13             | 4/13 | 2/13 | 5/13 | 1/13 | 1/13 | 5/13 | 7/13 | 1/13 | 3/13     | 2/13  | 3 Y<br>10 N             | 3 Y<br>10 N                | 1 Y<br>12 N                | 9 Y<br>4 N         | 9 Y<br>4 N | 3 Y<br>10 N                |   |

**Table S1. Patient demographics and clinical data.** Data are summarized in the bottom row as either median and [interquartile range] (age, duration of disease, CCI), absolute number (sex, invasive O<sub>2</sub>, immunosuppressive therapy, antiviral treatment), or relative number (CCI subcategories). Abbreviations: M= male, F= female, S= short-lived disease, L= long-lived disease, Y= yes, N= no. CCI= Charlson Comorbidity index, CVD= cardiovascular disease, CA= cardiac arrhythmia, Str= stroke, HP= hemiplegia, Dem= dementia, Dep= depression, CPD= chronic pulmonary disease, CKD= chronic kidney disease, Diab= diabetes, Dysl= dyslipidemia, ob= obesitas, Lymph= lymphoma. Footnotes: <sup>1</sup>=Sulfasalazine 500 mg long-term, <sup>2</sup>=Rituximab 500 mg/m<sup>2</sup> and methotrexate 3.5 gr/m<sup>2</sup> long-term, <sup>3</sup>= Methylprednisolone 8 mg long-term and 32 mg short-term, <sup>4</sup>=Rituximab 500 mg/m<sup>2</sup> long-term and methylprednisolone 32-64 mg short-term. <sup>5</sup>=Three-day treatment with remdesivir 13 days prior to death.

Supplementary Figure 1

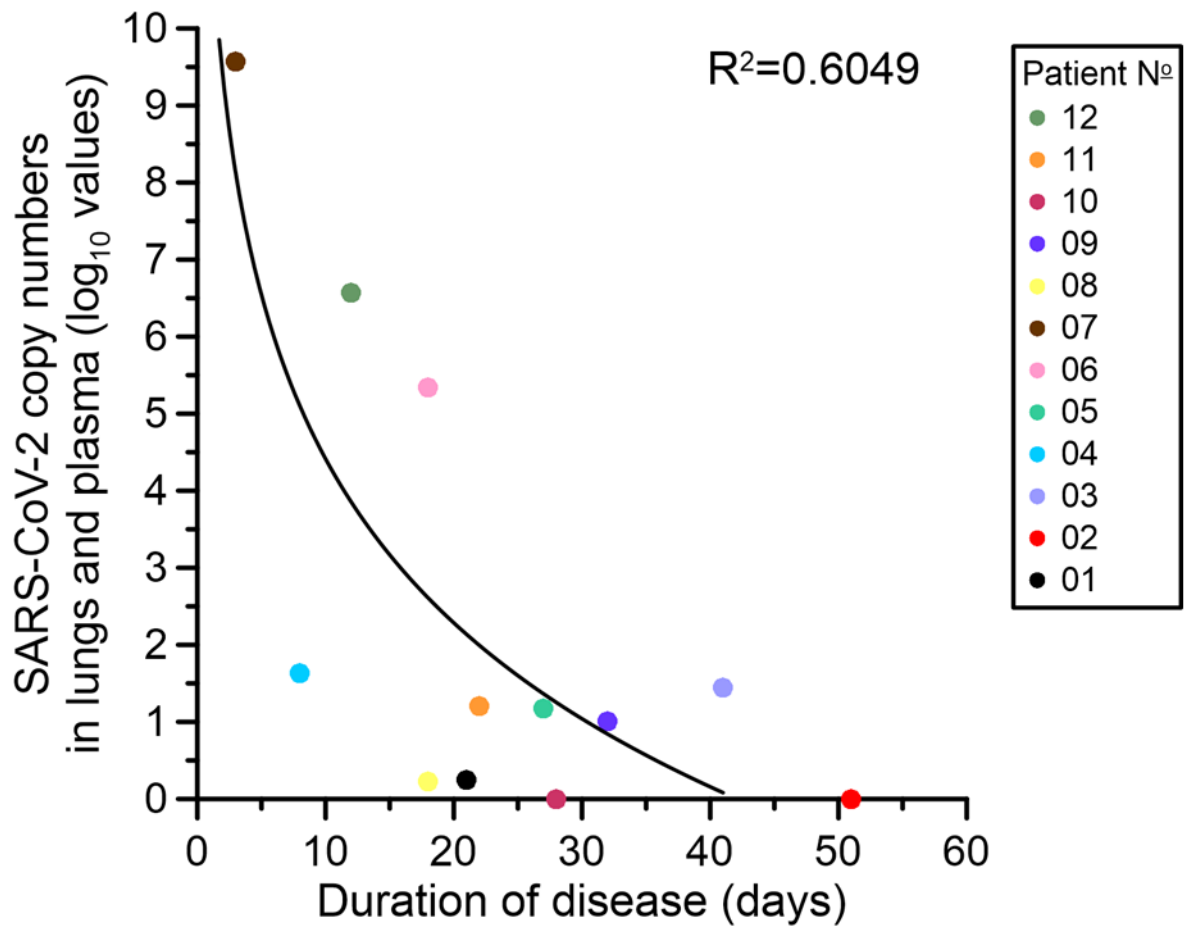

**Figure S1. SARS-CoV-2 RNA loads in lungs and plasma are negatively correlated with duration of COVID-19 in fatal cases.** The sum total of viral titers (log<sub>10</sub> values) in lungs and plasma was plotted against duration of disease for each case (different colors). The solid line represents the logarithmic regression line ( $R^2= 0.6049$ ,  $P= 0.003$ ,  $F=15.308$ ,  $df=10$ ). Case 13 was considered an outlier and removed from the dataset. Source data are provided as a Source Data file.

## Supplementary Figure 2

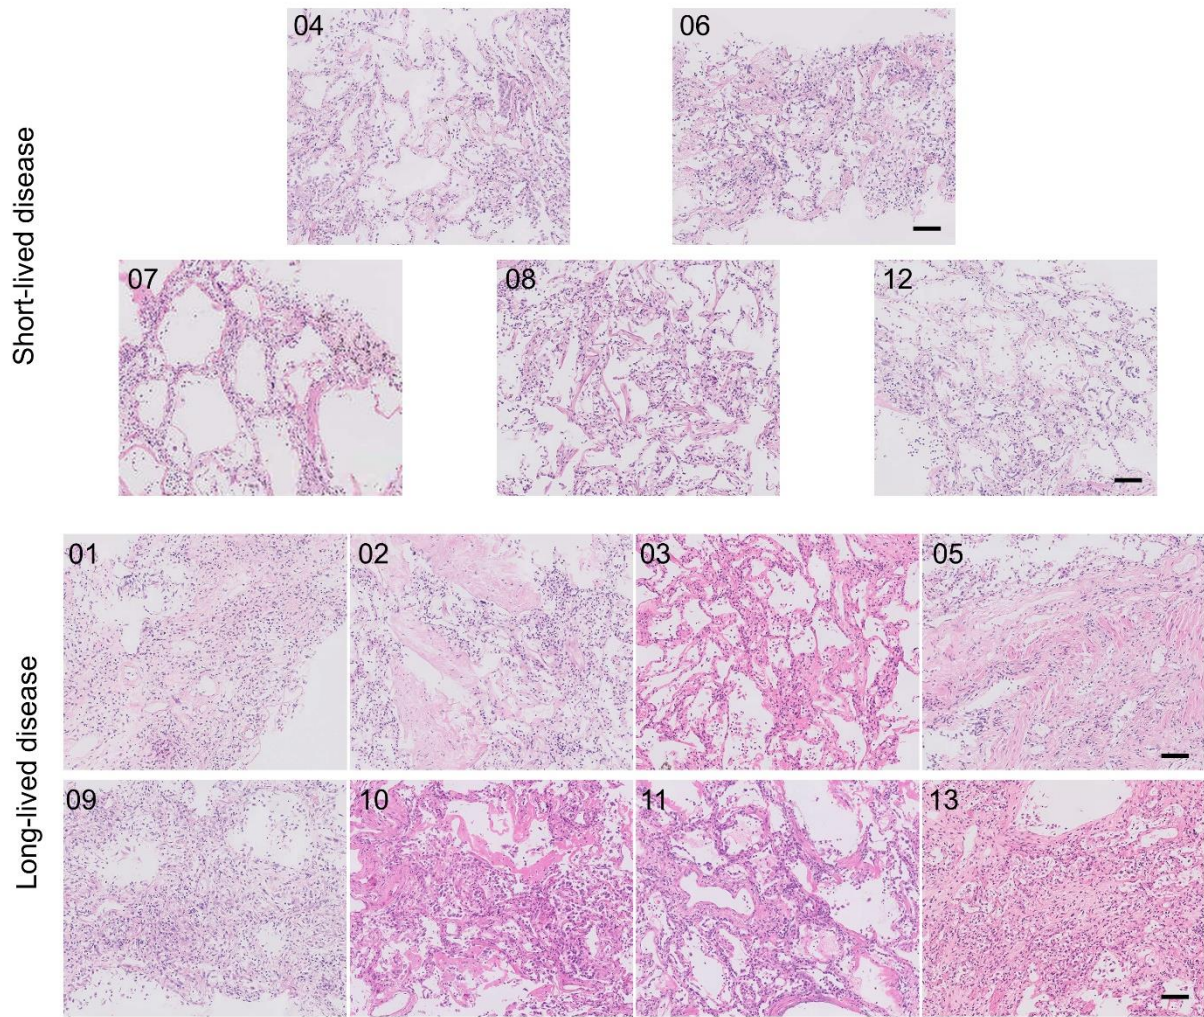

**Figure S2. Histopathological patterns of lung biopsies.** Hematoxylin (HE) staining of paraffin-embedded sections of lung tissues of our COVID-19 cohort. Cases with short-lived disease (N<sup>o</sup> 04, 06, 07, 08, and 12; upper panels) generally show histological patterns of acute exudative alveolar damage with reactive bronchial epithelia and edema, while cases with long-lived disease (N<sup>o</sup> 01, 02, 03, 05, 09, 10, 11 and 13; lower panels) are characterized by a remodeling pattern of acute respiratory distress with interstitial fibrosis and consolidation of airspace. Scale bars represent 100 µm.

Supplementary Figure 3

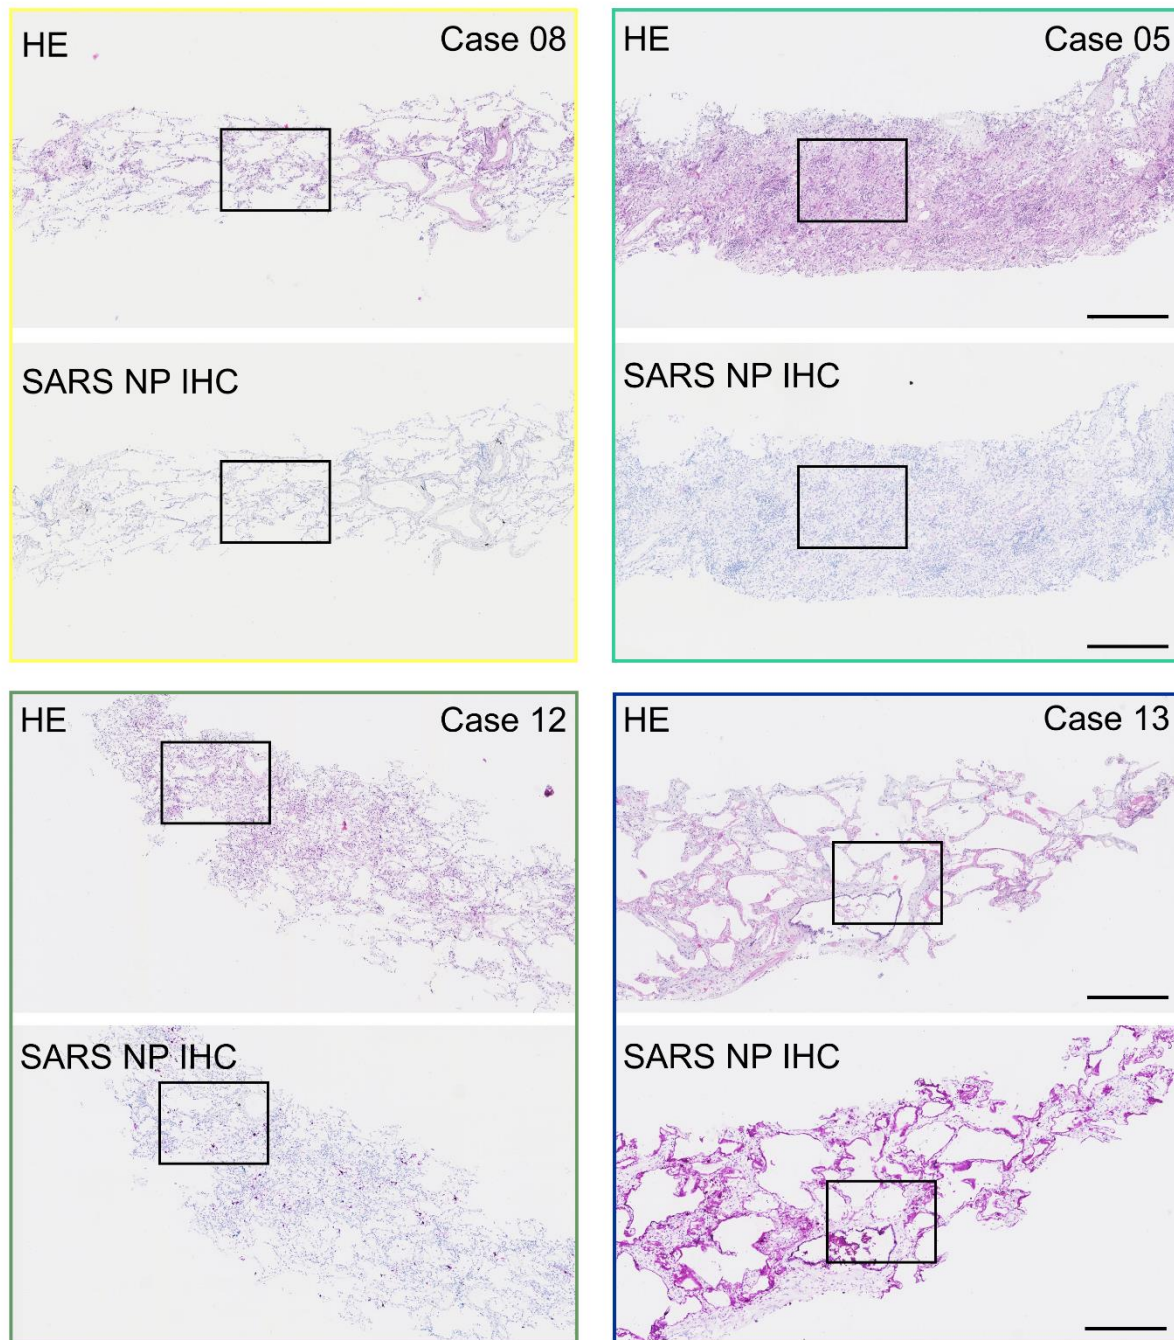

**Figure S3. Lower magnification images of HE- and SARS-CoV-2 NP IHC-stained paraffin-embedded sections shown in Fig. 1b.** Consecutive sections were either stained with hematoxylin-eosin (HE; upper images) or SARS-CoV-2 nucleocapsid protein (NP) immunohistochemistry (IHC; in purple; lower images). Picture delineations correspond to the respective case colors shown in the legend of Fig. 1a. The black squares represent selected areas shown in Fig. 1b (IHC) or corresponding areas on HE staining. Scale bars represent 500  $\mu$ m.

Supplementary Figure 4

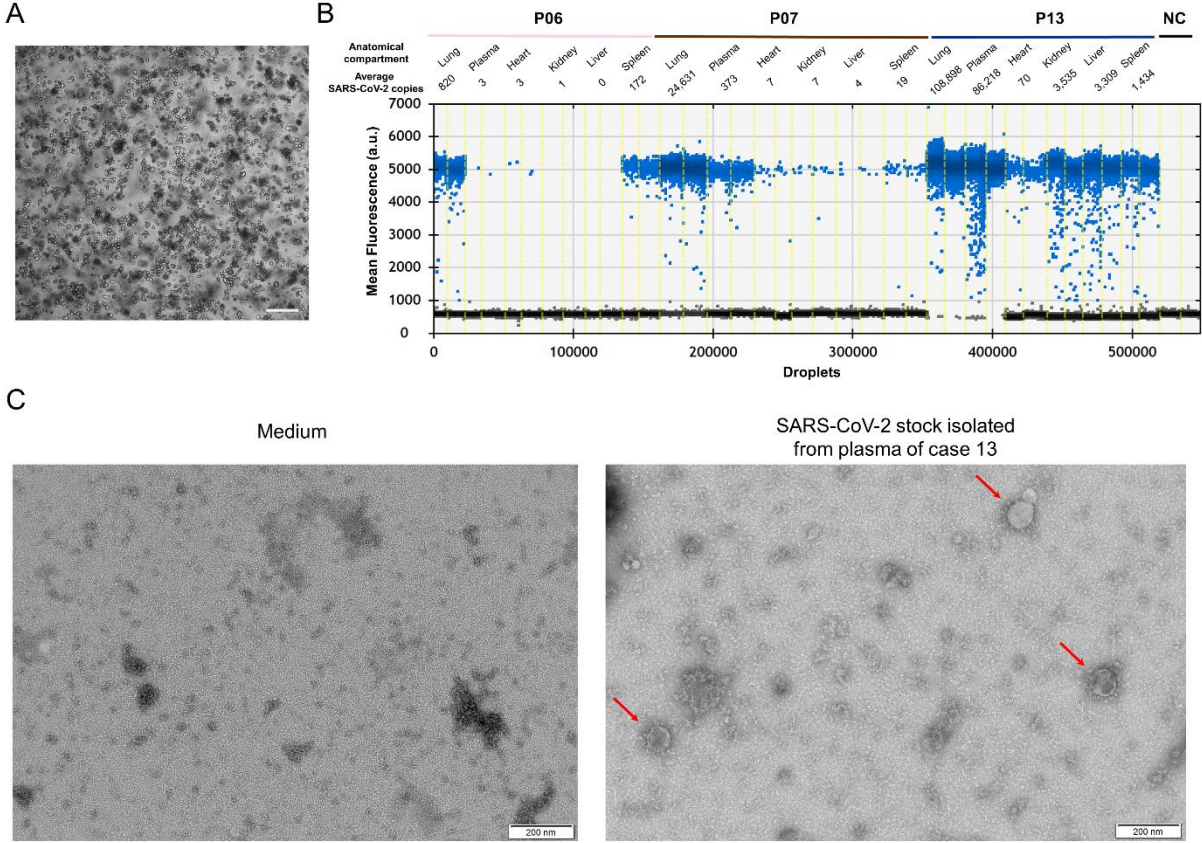

**Figure S4. Systemic spread of SARS-CoV-2.** (A) Inoculation of Vero E6 cells with SARS-CoV-2 from plasma of case 13 produced a lytic infection with characteristic rounding cytopathic effects (CPE) 2 days post inoculation. The scale bar represents 100  $\mu$ m. (B) Tabulated absolute concentrations of SARS-CoV-2 genome copies in all organs and plasma of three patients with viral dissemination to multiple organs (case 06, 07 and 13) using ddPCR. (C) Transmission electron microscopy images of negative control (complete medium only) and plasma-derived viral progeny produced on Vero E6 cells. Arrows indicate virions and scale bars indicate 200 nm.

### Supplementary Figure 5

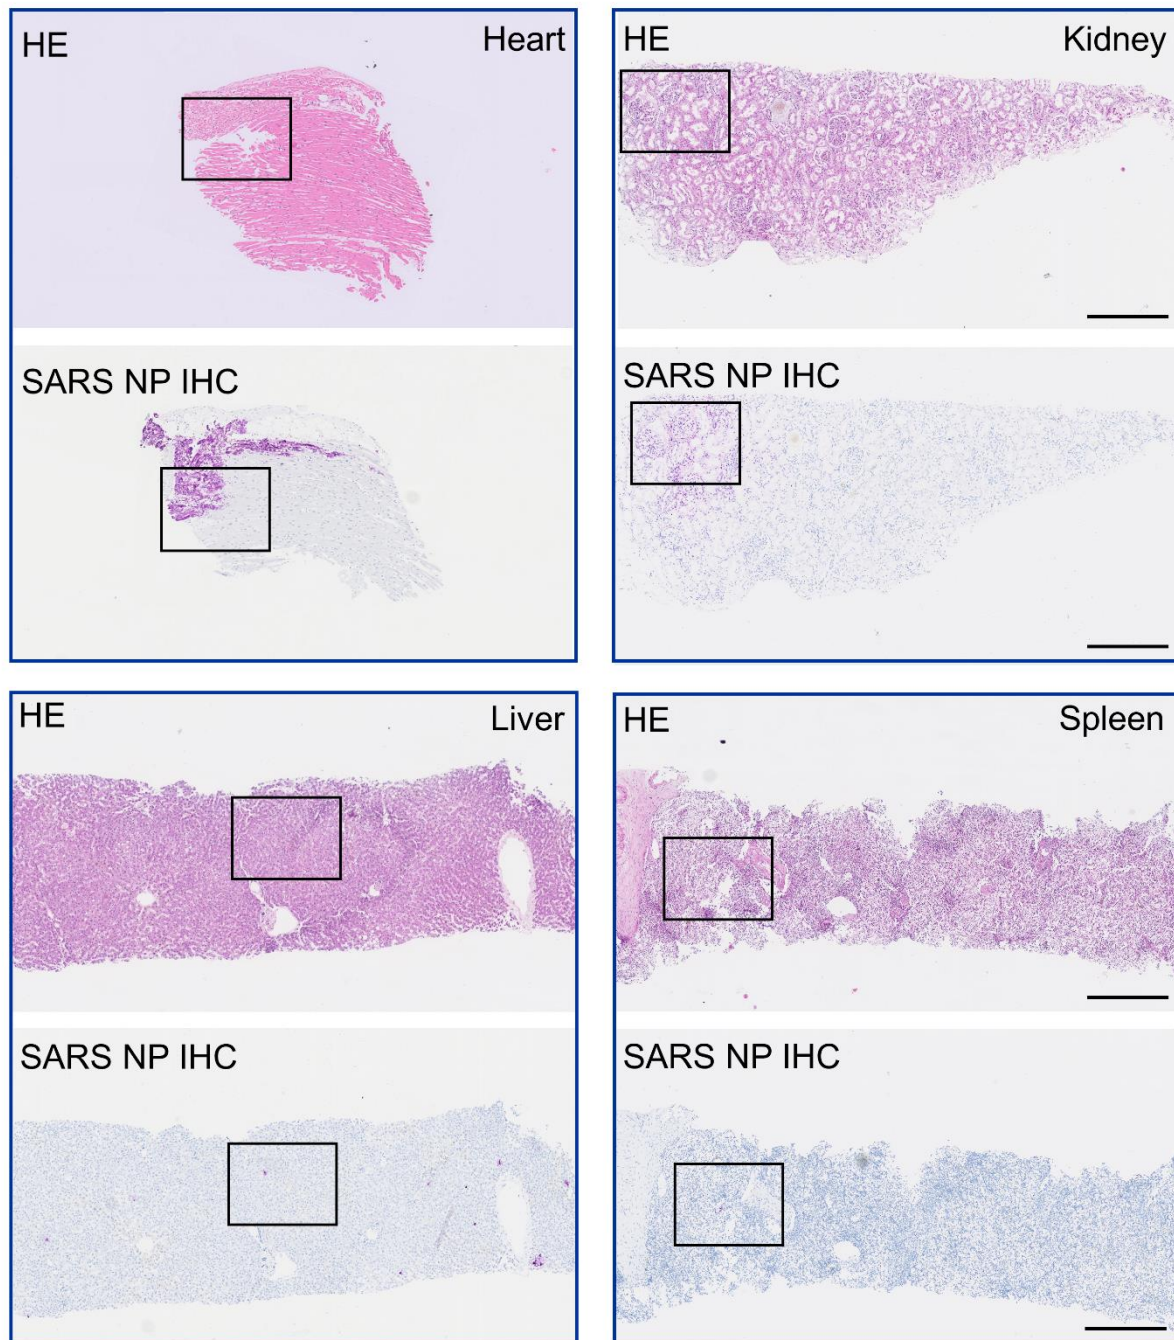

**Figure S5. Lower magnification images of HE- and SARS-CoV-2 NP IHC-stained paraffin-embedded sections shown in Fig. 1e.** Consecutive sections\* of different extrapulmonary tissues were either stained with hematoxylin-eosin (HE; upper images) or SARS-CoV-2 nucleocapsid protein (NP) immunohistochemistry (IHC; in purple; lower images). Picture delineations correspond to the respective case colors shown in the legend of Fig. 1d. The black squares represent selected areas shown in Fig. 1e (IHC) or corresponding areas on HE staining. Scale bars represent 500  $\mu\text{m}$ . \*Cardiac tissue sections derived from the same tissue block, but were not consecutive.

## Supplementary Figure 6

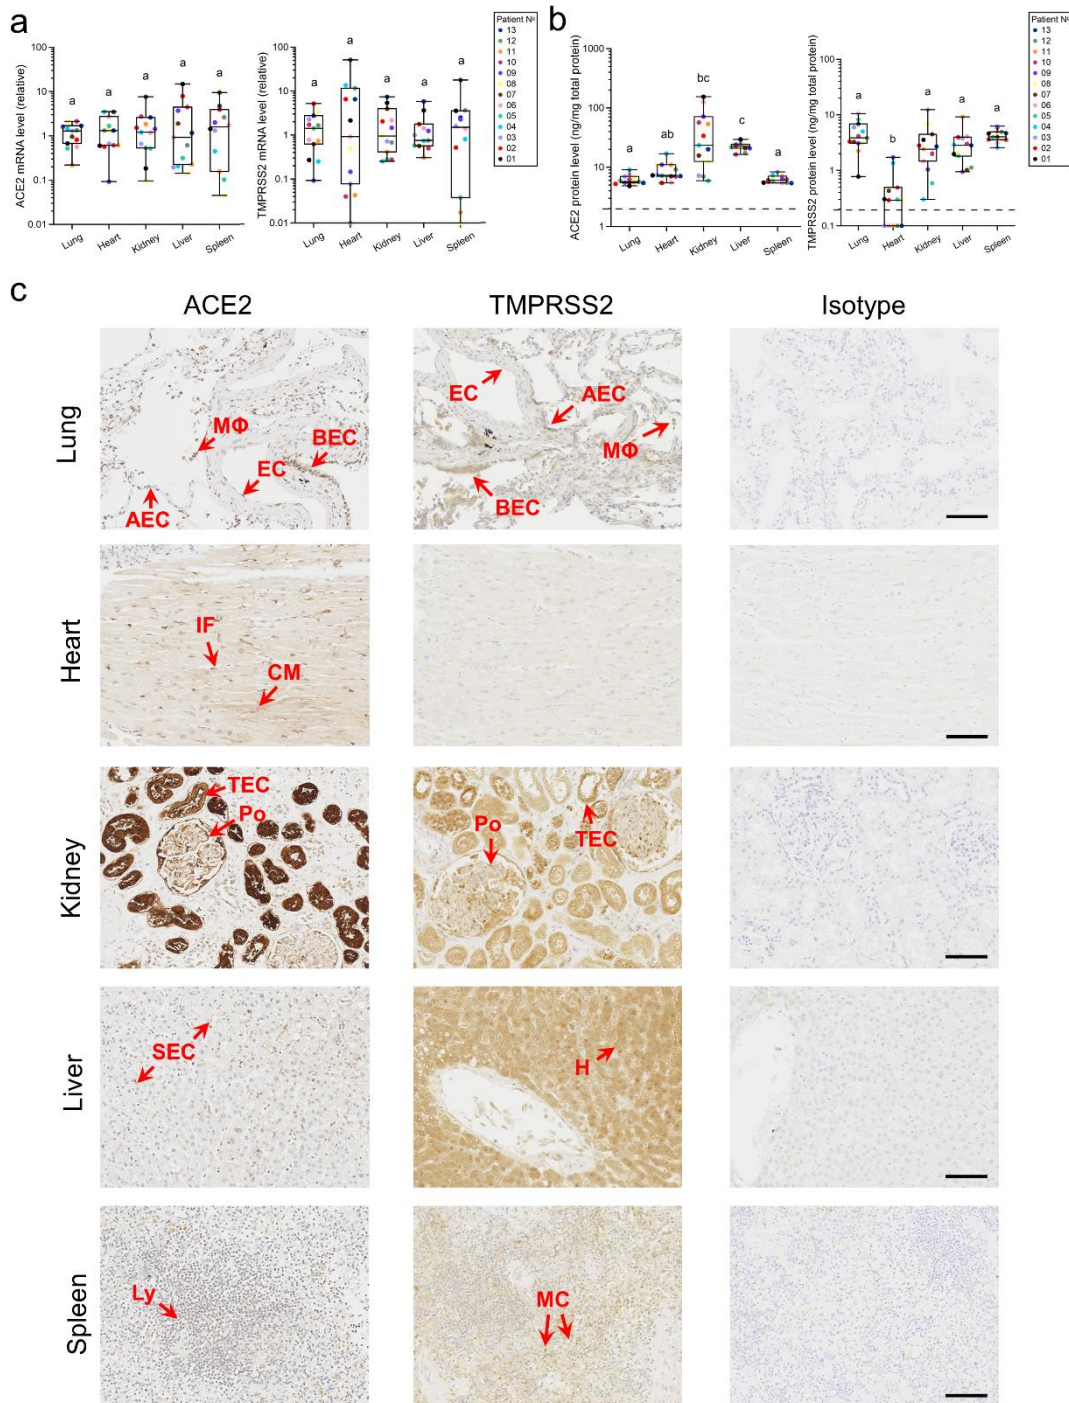

**Figure S6. Mapping of ACE2 and TMPRSS2 expression in selected postmortem tissues of severe COVID-19 cases.** Relative ACE2 and TMPRSS2 (a) mRNA and (b) protein levels in organs of different cases ( $n=13$ , different colors). Central tendencies for mRNA and protein levels are illustrated as boxplots where the band indicates the median, the box indicates the first and third quartiles and the whiskers indicate the minimum and maximum of all of the data. One-way ANOVA was performed on log-transformed ACE2 mRNA levels and did not identify a significant difference in mean ACE2 mRNA values between different organs ( $P=1.000$ ;  $F=0.000$ ;  $df=63$ ). A two-sided Kruskal-Wallis test did not identify a significant difference between TMPRSS2 mRNA values of different organs ( $P=0.999$ ;  $df=4$ ), but did identify significant differences between ACE2 and TMPRSS2 protein levels of different organs



(both  $P < 0.001$ ;  $df = 4$ ). Case 10 mRNA data were considered outliers and not included in the statistical test ( $n = 12$ ). The significance of pairwise two-sided comparisons (Bonferroni-corrected for the number of pairwise comparisons performed) is indicated by different letters on the plots. The  $P$  value for significant differences in ACE2 protein levels between different organs was  $< 0.001$ , except for the comparison between heart and liver ( $P = 0.034$ ). The  $P$  value for significant differences in TMPRSS2 protein levels between different organs was  $< 0.001$  when comparing heart with lung and spleen and 0.014 and 0.012 when comparing heart with kidney and liver, respectively. Source data are provided as a Source Data file. (c) Representative images of ACE2 (long form only; left panels), TMPRSS2 (middle panels), and isotype control (right panels) staining (in brown) on paraffin-embedded sections of lung, heart, kidney, liver, and spleen tissue. Arrows indicate immune-stained cells. Abbreviations (in alphabetical order): AEC= alveolar epithelial cell, BEC= bronchiolar epithelial cell, CM= cardiomyocyte, EC= endothelial cell, H= hepatocyte, Ly= lymphocyte,  $M\phi$ = macrophage, MC= myeloid cell, Po= podocyte, SEC= sinusoidal endothelial cell, TEC= tubular epithelial cell. Scale bars represent 100  $\mu\text{m}$ .

Supplementary Table 2

| Gene                              | Nt change | AA change   | Frequency of detection per anatomical compartment (%) |        |              |              |
|-----------------------------------|-----------|-------------|-------------------------------------------------------|--------|--------------|--------------|
|                                   |           |             | Lungs                                                 | Plasma | Heart        | Kidney       |
| <i>5' UTR</i>                     | C241T     | /           | <b>99,86</b>                                          | 99,97  | <b>99,97</b> | <b>99,97</b> |
| <i>ORF1a</i>                      | C398T     | ORF1a:H45Y  | <b>99,86</b>                                          | 99,75  | <b>99,91</b> | <b>99,91</b> |
| <i>ORF1a</i>                      | C3037T    | /           | <b>99,88</b>                                          | 99,76  | <b>99,72</b> | <b>99,84</b> |
| <i>ORF1b</i>                      | C13536T   | /           | <b>99,92</b>                                          | 99,92  | <b>99,88</b> | <b>99,97</b> |
| <i>ORF1b</i>                      | C14408T   | ORF1b:P314L | <b>99,6</b>                                           | 99,77  | <b>99,7</b>  | <b>99,56</b> |
| <i>ORF1b</i>                      | A20127G   | /           | <b>90,91</b>                                          | 100    | <b>99,67</b> | <b>100</b>   |
| <i>S</i>                          | C23731T   | /           | <b>100</b>                                            | 99,82  | <b>99,28</b> | <b>98,96</b> |
| <b>Color range per percentage</b> |           |             | 0                                                     | 25     | 50           | 100          |

**Table S2. SARS-CoV-2 genome single nucleotide variants (SNVs) in postmortem tissues and plasma of case 07.** Variants were mapped to clade 20D genome and called if case frequencies were higher than 20% in at least one anatomical compartment. SNV frequency is noted per organ. A heat map with different colors indicates the frequency of mutant detection per organ (the lower bar shows the color range of different percentages). Bold numbers indicate that the latter variant was also identified in SARS-CoV-2 progeny on Vero E6 cells of respective tissue samples (frequencies  $> 1\%$ ).

Supplementary Table 3

| Gene         | Nt change | AA change   | Frequency of detection per anatomical compartment (%) |              |              |              |              |              |
|--------------|-----------|-------------|-------------------------------------------------------|--------------|--------------|--------------|--------------|--------------|
|              |           |             | Lungs                                                 | Plasma       | Heart        | Kidney       | Liver        | Spleen       |
| <i>ORF1a</i> | T322A     | /           | 40,81                                                 | 0            | 6,57         | 0            | 0            | 0            |
| <i>ORF1a</i> | G1068A    | NSP2:G268E  | 0                                                     | 0            | 0            | 0            | 0            | 28,5         |
| <i>ORF1a</i> | C1862T    | NSP2:L533F  | 33,28                                                 | 5,9          | 8,78         | 0            | 0            | 3,11         |
| <i>ORF1a</i> | C2094T    | NSP2:S610L  | <b>99,56</b>                                          | <b>99,55</b> | <b>99,62</b> | <b>100</b>   | <b>100</b>   | <b>99,62</b> |
| <i>ORF1a</i> | T2149C    | /           | 20,58                                                 | 1,35         | $< 1$        | $< 1$        | $< 1$        | $< 1$        |
| <i>ORF1a</i> | T5395A    | NSP3:F2328V | 39,67                                                 | 5,95         | 4,12         | $< 1$        | 11,9         | 4,03         |
| <i>ORF1a</i> | A5405G    | NSP3:I1714V | 17,73                                                 | 10,45        | 30,22        | 5,76         | 10,89        | 4,1          |
| <i>ORF1a</i> | T5406C    | NSP3:I1714T | <b>10,63</b>                                          | <b>12,5</b>  | <b>28,95</b> | <b>89,21</b> | <b>32,82</b> | <b>6,63</b>  |
| <i>ORF1a</i> | C7239T    | NSP3:A2325V | 46,19                                                 | 8,06         | 20,07        | $< 1$        | 16,67        | 5,56         |
| <i>ORF1a</i> | T7247G    | NSP3:F2328V | <b>29,24</b>                                          | <b>14,66</b> | <b>6,78</b>  | <b>87,36</b> | <b>37,5</b>  | <b>6,77</b>  |
| <i>ORF1a</i> | C7279T    | /           | <b>1,17</b>                                           | 1,84         | $< 1$        | <b>83,3</b>  | $< 1$        | $< 1$        |

|                            |         |              |       |       |       |       |       |       |
|----------------------------|---------|--------------|-------|-------|-------|-------|-------|-------|
| <i>ORF1a</i>               | C8175T  | NSP3:A2637V  | 14,31 | 45,94 | 42,28 | 1,85  | 38,91 | 11,11 |
| <i>ORF1a</i>               | A8387G  | NSP3:N2708D  | 1,92  | 2,89  | <1    | 88,86 | 2,5   | 1,32  |
| <i>ORF1a</i>               | C9438T  | NSP4:T3058I  | 14,4  | 44,24 | 24,27 | 1,11  | 35,56 | 11,64 |
| <i>ORF1a</i>               | C9491T  | NSP4:H3076Y  | 2,84  | 1,28  | 33,29 | <1    | 5,65  | 4,05  |
| <i>ORF1a</i>               | A9737G  | NSP4:S3158G  | 39,58 | 9,44  | 7,07  | 44,79 | 13,87 | 5,96  |
| <i>ORF1a</i>               | C10369T | /            | 1,54  | <1    | <1    | <1    | 6,04  | 27,3  |
| <i>ORF1a</i>               | C11008T | /            | 20,69 | 2,92  | 5,3   | <1    | 3,69  | 2,17  |
| <i>ORF1a</i>               | C12439T | NSP8:P4058L  | 8,71  | 5,35  | 5,76  | 48,05 | 21,86 | 4,07  |
| <i>ORF1a</i>               | C12513T | NSP8:T4083M  | <1    | <1    | <1    | 7,04  | <1    | 62,73 |
| <i>ORF1a</i>               | T13417C | /            | 99,25 | 98,09 | 97,72 | 99,15 | 94,8  | 98,89 |
| <i>ORF1a</i>               | A13433G | NSP10:M4390G | 1,13  | 1,59  | <1    | 30,19 | 1,84  | <1    |
| <i>ORF1b</i>               | A13947T | /            | 99,5  | 99,17 | 99,46 | 99,26 | 99,64 | 98,96 |
| <i>ORF1b</i>               | C14786T | RdRp:A440V   | 46,74 | 4,66  | 8,13  | <1    | 8,85  | 3,66  |
| <i>ORF1b</i>               | C14937T | /            | <1    | <1    | <1    | <1    | <1    | 64,31 |
| <i>ORF1b</i>               | C15222T | /            | 1,84  | 24,59 | 7,67  | 1,24  | 7,97  | 2,96  |
| <i>ORF1b</i>               | C16092T | /            | <1    | <1    | <1    | 30,42 | <1    | <1    |
| <i>ORF1b</i>               | C17004T | /            | 39    | 6,46  | 13,84 | 0     | 7,85  | 4,12  |
| <i>ORF1b</i>               | T18024C | /            | <1    | <1    | <1    | 27,86 | <1    | <1    |
| <i>ORF1b</i>               | A18179G | NSP14:K1571R | <1    | 27,26 | 4,86  | <1    | 6,34  | 3,35  |
| <i>ORF1b</i>               | T18678C | /            | <1    | 30,76 | 6,55  | <1    | 7,03  | 3,55  |
| <i>ORF1b</i>               | T18750C | /            | <1    | <1    | <1    | 27,13 | <1    | <1    |
| <i>ORF1b</i>               | C18979T | NSP14:H1838Y | <1    | <1    | <1    | 40,81 | <1    | <1    |
| <i>S</i>                   | C21789T | S:T76I       | 41,05 | 7,19  | <1    | <1    | 11,52 | 4,13  |
| <i>S</i>                   | G22363T | /            | 4,65  | 2,14  | <1    | 43,97 | 3,4   | 1,06  |
| <i>S</i>                   | G22661T | S:V367F      | 5,62  | <1    | 10,34 | 3,07  | 1,9   | 68,08 |
| <i>S</i>                   | A22920T | S:Y453F      | 52,52 | <1    | <1    | <1    | 11,13 | 5,06  |
| <i>S</i>                   | A23063T | S:N501Y      | 18,46 | 14,29 | 20,69 | 39,63 | 31,27 | 5,04  |
| <i>S</i>                   | G23782A | S:M740I      | 20,87 | 8,26  | <1    | <1    | 4,55  | 1,72  |
| <i>S</i>                   | G24316T | S:E918D      | <1    | 3     | 45,65 | <1    | 11,33 | 1,94  |
| <i>S</i>                   | T24450C | S:V963A      | 36,09 | 6,21  | 16,15 | <1    | 11,27 | 3,15  |
| <i>S</i>                   | C24642T | S:T1027I     | 44,18 | 27,94 | 27,48 | 49,78 | 23,26 | 7,74  |
| <i>E</i>                   | C26333T | E:T30I       | 83,41 | 49,57 | 81,39 | 2,25  | 60,29 | 41,17 |
| <i>E</i>                   | C26351T | E:A36V       | <1    | <1    | <1    | <1    | <1    | 33,61 |
| <i>ORF7a</i>               | A27574T | ORF7a:T61S   | 2     | 2,1   | <1    | 88,65 | 3,16  | <1    |
| <i>N</i>                   | A28336T | /            | <1    | <1    | <1    | <1    | <1    | 62,93 |
| <i>N</i>                   | C29200T | /            | <1    | <1    | 54,51 | <1    | <1    | <1    |
| <i>N</i>                   | A29424G | N:Q384R      | <1    | <1    | <1    | 27,03 | <1    | <1    |
| <i>ORF10</i>               | C29592T | ORF10:T34M   | 1,78  | 1,45  | 1,98  | 49,64 | 2,76  | <1    |
| <i>3' UTR</i>              | G29744A | /            | <1    | <1    | <1    | <1    | <1    | 61,12 |
| Color range per percentage |         |              | <1    | 20    | 40    | 60    | 80    | 100   |

**Table S3. SARS-CoV-2 genome single nucleotide variants (SNVs) in postmortem tissues and plasma of case 13.** The same table as Table 1 is shown as a heat map with different colors indicating the frequency of mutant detection per organ (the lower bar shows the color range of different percentages).

## Supplementary Figure 7

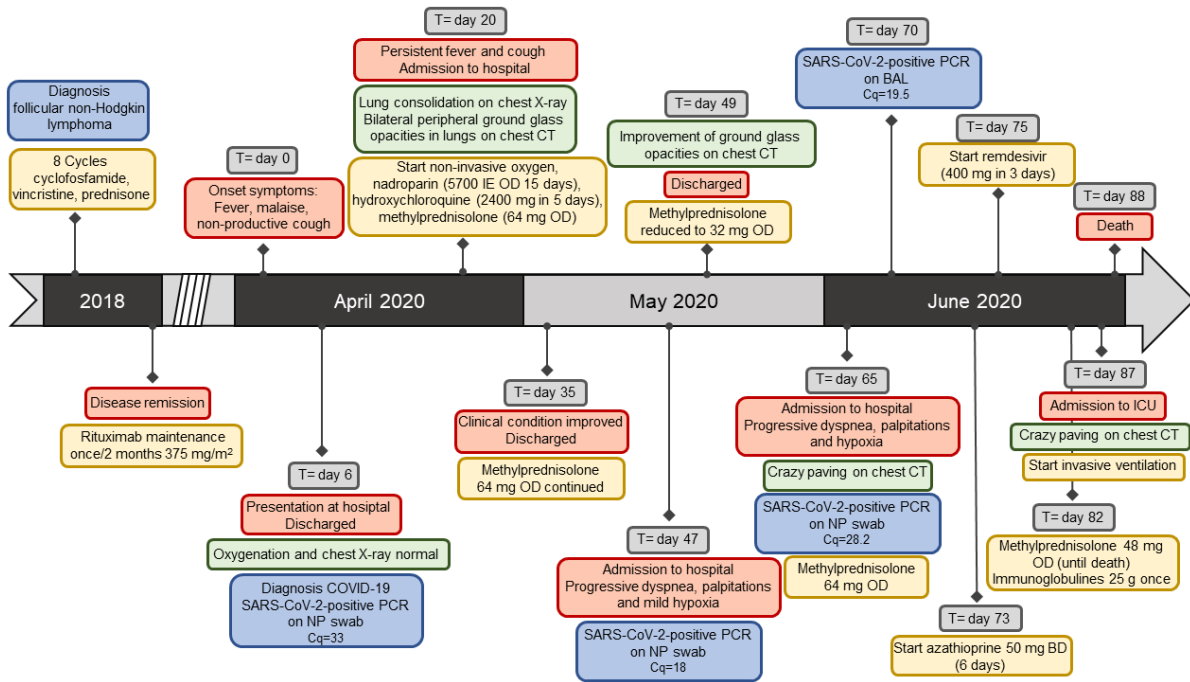

**Figure S7. Timeline of the clinical history and disease course in case 13.** Abbreviations (in alphabetical order): BAL= broncho-alveolar lavage, BD= twice a day, Cq= quantification cycle, CT= computed tomography, ICU= intensive care unit, NP swab= nasopharyngeal swab, OD= once a day, T= time point.

## Supplementary Figure 8

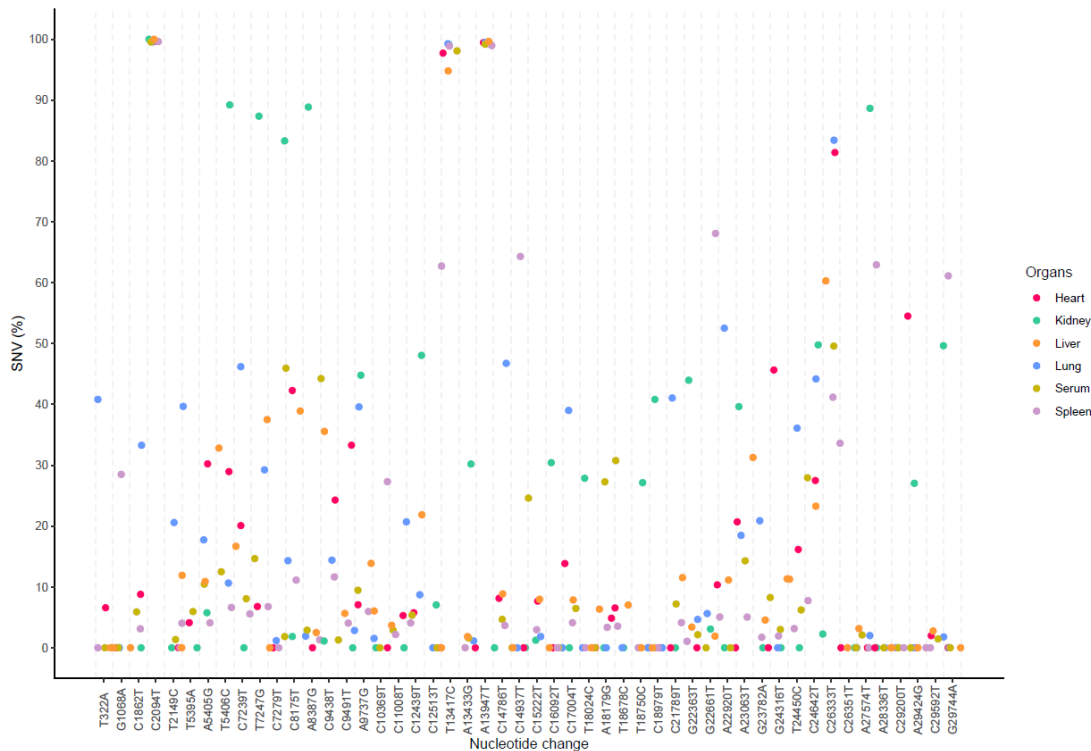

**Figure S8. Scatter plot of SARS-CoV-2 SNV frequencies in postmortem tissues and plasma of case 13 ranked per anatomical compartment.** Nucleotide positions and single nucleotide variation (SNV) frequencies are indicated on the X axis and the Y axis, respectively. Different colors indicate different organs (shown in the figure legend).

### Supplementary Table 4

| Gene                              | Nt position | Size (bp) | Frequency of detection per anatomical compartment |        |       |        |       |        |
|-----------------------------------|-------------|-----------|---------------------------------------------------|--------|-------|--------|-------|--------|
|                                   |             |           | Lungs                                             | Plasma | Heart | Kidney | Liver | Spleen |
| S                                 | 21645-23592 | 1947      | <1                                                | <1     | <1    | <1     | <1    | 19,29  |
| S                                 | 21737-23665 | 1928      | <1                                                | <1     | <1    | 12,16  | <1    | <1     |
| S                                 | 21892-23078 | 1186      | <1                                                | <1     | <1    | <1     | 52,62 | <1     |
| S                                 | 22063-22485 | 422       | <1                                                | <1     | <1    | <1     | 11,61 | <1     |
| ORF8                              | 27998-28089 | 91        | <1                                                | 1,27   | <1    | 83,86  | 10,35 | <1     |
| <b>Color range per percentage</b> |             |           | <1                                                | 20     | 40    | 60     | 80    | 100    |

**Table S4. SARS-CoV-2 genome deletions in postmortem tissues and plasma of case 13.** Variants were mapped to clade 20B genome and deletion frequencies were estimated using Sniffles (v1.0.11). A heat map with different colors indicates the frequency of mutant detection per organ (the lower bar shows the color range of different percentages).

### Supplementary Figure 9

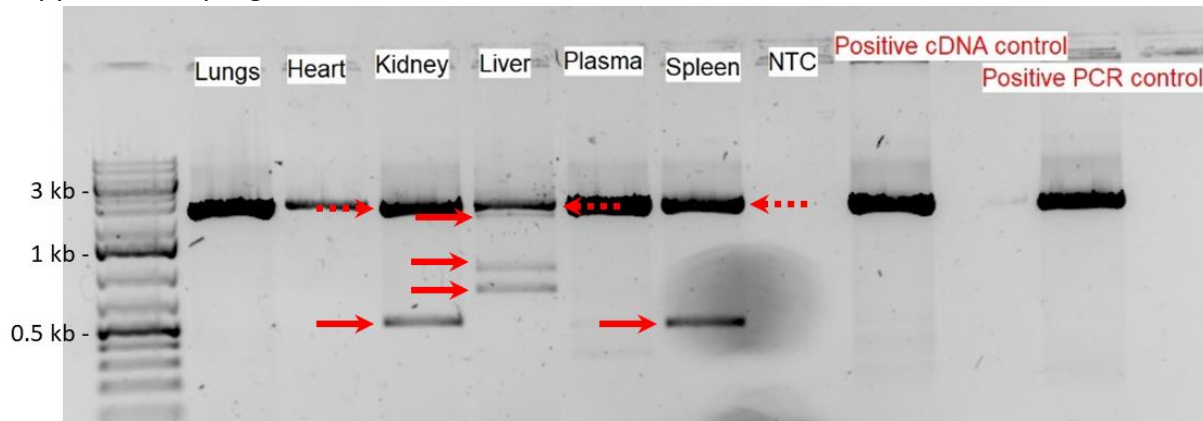

**Figure S9. PCR product patterns amplified by the primer pair A6 targeting the partial S gene (nts 21,386-23,824) (case 13).** Samples are cDNA derived from different tissues, a negative control (NTC; no template), positive cDNA control (newly synthesized cDNA from a SARS-CoV-2-positive nasopharyngeal swab), or positive PCR control (stored cDNA from a SARS-CoV-2-positive nasopharyngeal swab). Regular arrows indicate products of SARS-CoV-2 variants with large genomic deletions and the dashed arrows indicate the predicted product (2483 bp).

### Supplementary Table 5

| Name           | Forward (5'-3')        | Reverse (5'-3')          |
|----------------|------------------------|--------------------------|
| ACE2           | CATTGGAGCAAGTGTGGATCTT | GAGCTAATGCATGCCATTCTCA   |
| TMPRSS2        | ACCGGAAAACCCCTATCCCG   | TGCAGACGACGGGGTTGGAA     |
| ACTB           | GGCTGTATCCCCTCCATCG    | CCAGTTGGTAACAATGCCATGT   |
| GAPDH          | AGGTCGGTGTGAACGGATTTG  | GGGGTCGTTGATGGCAACA      |
| YWHA           | TGTCACGGTGTGGACGC      | ATGACGTCAAACGCTTCTGG     |
| SARS-CoV-2 N1* | GACCCAAAATCAGCGAAAT    | TCTGGTTACTGCCAGTTGAATCTG |

**Table S5. Primer sequences used for qPCR and ddPCR.** \*For the SARS-CoV-2 N1 qPCR assay, a TaqMan® probe was used. This probe was labeled at the 5'-end with the reporter molecule 6-carboxyfluorescein (FAM) and with the quencher Black Hole Quencher 1 (BHQ-1) at the 3'-end (Integrated DNA Technologies).

## Supplementary Table 6

We gratefully acknowledge the following Authors from the Originating laboratories responsible for obtaining the specimens, as well as the Submitting laboratories where the genome data were generated and shared via GISAID, on which this research is based.

All Submitters of data may be contacted directly via [www.gisaid.org](http://www.gisaid.org)

Authors are sorted alphabetically

| Accession ID                                                                                                                                                                                                                                                                                                                                                                                                                                                                                                                                                                                                                                                                                                                                                                                                                                                                                                                                                                                                                                                                                                                                                                                                                                                                                                                                                                                                                                                                                                                                                                                                                                                                                                                                                                                                                                                                                                                                                                                                                                                                                                                                                                                                                                                                                                                                   | Originating Laboratory                                                 | Submitting Laboratory                                                  | Authors                                                                                                                                         |
|------------------------------------------------------------------------------------------------------------------------------------------------------------------------------------------------------------------------------------------------------------------------------------------------------------------------------------------------------------------------------------------------------------------------------------------------------------------------------------------------------------------------------------------------------------------------------------------------------------------------------------------------------------------------------------------------------------------------------------------------------------------------------------------------------------------------------------------------------------------------------------------------------------------------------------------------------------------------------------------------------------------------------------------------------------------------------------------------------------------------------------------------------------------------------------------------------------------------------------------------------------------------------------------------------------------------------------------------------------------------------------------------------------------------------------------------------------------------------------------------------------------------------------------------------------------------------------------------------------------------------------------------------------------------------------------------------------------------------------------------------------------------------------------------------------------------------------------------------------------------------------------------------------------------------------------------------------------------------------------------------------------------------------------------------------------------------------------------------------------------------------------------------------------------------------------------------------------------------------------------------------------------------------------------------------------------------------------------|------------------------------------------------------------------------|------------------------------------------------------------------------|-------------------------------------------------------------------------------------------------------------------------------------------------|
| EPI_ISL_1020171, EPI_ISL_1020172, EPI_ISL_1020173, EPI_ISL_1020174                                                                                                                                                                                                                                                                                                                                                                                                                                                                                                                                                                                                                                                                                                                                                                                                                                                                                                                                                                                                                                                                                                                                                                                                                                                                                                                                                                                                                                                                                                                                                                                                                                                                                                                                                                                                                                                                                                                                                                                                                                                                                                                                                                                                                                                                             | AZ Klina                                                               | AZ Klina                                                               | Dr. C. Vael                                                                                                                                     |
| EPI_ISL_1029957, EPI_ISL_1029958, EPI_ISL_1029959, EPI_ISL_1029960, EPI_ISL_1029961, EPI_ISL_1029962, EPI_ISL_1029963, EPI_ISL_1029964, EPI_ISL_1029965, EPI_ISL_1029966, EPI_ISL_1029967, EPI_ISL_1029968, EPI_ISL_1029969, EPI_ISL_1029971, EPI_ISL_1029972, EPI_ISL_1029973                                                                                                                                                                                                                                                                                                                                                                                                                                                                                                                                                                                                                                                                                                                                                                                                                                                                                                                                                                                                                                                                                                                                                                                                                                                                                                                                                                                                                                                                                                                                                                                                                                                                                                                                                                                                                                                                                                                                                                                                                                                                 | Cliniques universitaires Saint-Luc                                     | UCLouvain/IREC/MBLG                                                    | Jean Ruelle, Lysa Pinsmaye, Benoît Kabamba Mukadi                                                                                               |
| see above                                                                                                                                                                                                                                                                                                                                                                                                                                                                                                                                                                                                                                                                                                                                                                                                                                                                                                                                                                                                                                                                                                                                                                                                                                                                                                                                                                                                                                                                                                                                                                                                                                                                                                                                                                                                                                                                                                                                                                                                                                                                                                                                                                                                                                                                                                                                      | LHUB-ULB                                                               | LHUB-ULB                                                               | Charlotte Michel, Olivier Vandenberg, Marie Hallin                                                                                              |
| EPI_ISL_1180935                                                                                                                                                                                                                                                                                                                                                                                                                                                                                                                                                                                                                                                                                                                                                                                                                                                                                                                                                                                                                                                                                                                                                                                                                                                                                                                                                                                                                                                                                                                                                                                                                                                                                                                                                                                                                                                                                                                                                                                                                                                                                                                                                                                                                                                                                                                                | KU Leuven, Clinical and Epidemiological Virology                       | KU Leuven, Clinical and Epidemiological Virology                       | Bert Vanmechelen, Elke Wollants, Annabel Rector, Els Keyaerts, Lies Laenen, Marc Van Ranst, and Piet Maes                                       |
| EPI_ISL_407976                                                                                                                                                                                                                                                                                                                                                                                                                                                                                                                                                                                                                                                                                                                                                                                                                                                                                                                                                                                                                                                                                                                                                                                                                                                                                                                                                                                                                                                                                                                                                                                                                                                                                                                                                                                                                                                                                                                                                                                                                                                                                                                                                                                                                                                                                                                                 | KU Leuven, Clinical and Epidemiological Virology                       | KU Leuven, Clinical and Epidemiological Virology                       | Bert Vanmechelen, Joan Marti-Carreras, Tony Wawina, Marc Van Ranst, Piet Maes                                                                   |
| EPI_ISL_415153                                                                                                                                                                                                                                                                                                                                                                                                                                                                                                                                                                                                                                                                                                                                                                                                                                                                                                                                                                                                                                                                                                                                                                                                                                                                                                                                                                                                                                                                                                                                                                                                                                                                                                                                                                                                                                                                                                                                                                                                                                                                                                                                                                                                                                                                                                                                 | KU Leuven, Clinical and Epidemiological Virology                       | KU Leuven, Clinical and Epidemiological Virology                       | Bert Vanmechelen, Joan Marti-Carreras, Tony Wawina, Marc Van Ranst, Piet Maes.                                                                  |
| EPI_ISL_415154                                                                                                                                                                                                                                                                                                                                                                                                                                                                                                                                                                                                                                                                                                                                                                                                                                                                                                                                                                                                                                                                                                                                                                                                                                                                                                                                                                                                                                                                                                                                                                                                                                                                                                                                                                                                                                                                                                                                                                                                                                                                                                                                                                                                                                                                                                                                 | KU Leuven, Clinical and Epidemiological Virology                       | KU Leuven, Clinical and Epidemiological Virology                       | Bert Vanmechelen, Joan Marti-Carreras, Tony Wawina, Marc Van Ranst, Piet Maes                                                                   |
| EPI_ISL_415155                                                                                                                                                                                                                                                                                                                                                                                                                                                                                                                                                                                                                                                                                                                                                                                                                                                                                                                                                                                                                                                                                                                                                                                                                                                                                                                                                                                                                                                                                                                                                                                                                                                                                                                                                                                                                                                                                                                                                                                                                                                                                                                                                                                                                                                                                                                                 | KU Leuven, Clinical and Epidemiological Virology                       | KU Leuven, Clinical and Epidemiological Virology                       | Bert Vanmechelen, Joan Marti-Carreras, Tony Wawina, Marc Van Ranst, Piet Maes                                                                   |
| EPI_ISL_415156, EPI_ISL_415157, EPI_ISL_415158, EPI_ISL_415159                                                                                                                                                                                                                                                                                                                                                                                                                                                                                                                                                                                                                                                                                                                                                                                                                                                                                                                                                                                                                                                                                                                                                                                                                                                                                                                                                                                                                                                                                                                                                                                                                                                                                                                                                                                                                                                                                                                                                                                                                                                                                                                                                                                                                                                                                 | KU Leuven, Clinical and Epidemiological Virology                       | KU Leuven, Clinical and Epidemiological Virology                       | Bert Vanmechelen, Joan Marti-Carreras, Tony Wawina, Piet Maes                                                                                   |
| EPI_ISL_416467, EPI_ISL_416468, EPI_ISL_416469, EPI_ISL_416470, EPI_ISL_416471, EPI_ISL_416472, EPI_ISL_416475, EPI_ISL_416476                                                                                                                                                                                                                                                                                                                                                                                                                                                                                                                                                                                                                                                                                                                                                                                                                                                                                                                                                                                                                                                                                                                                                                                                                                                                                                                                                                                                                                                                                                                                                                                                                                                                                                                                                                                                                                                                                                                                                                                                                                                                                                                                                                                                                 | KU Leuven, Clinical and Epidemiological Virology                       | KU Leuven, Clinical and Epidemiological Virology                       | Bert Vanmechelen, Tony Wawina, Joan Marti-Carreras, Piet Maes                                                                                   |
| EPI_ISL_416997, EPI_ISL_417004, EPI_ISL_417006, EPI_ISL_417008, EPI_ISL_417009, EPI_ISL_417012, EPI_ISL_417013, EPI_ISL_417014, EPI_ISL_417015, EPI_ISL_417016, EPI_ISL_417017, EPI_ISL_417018, EPI_ISL_417019, EPI_ISL_417020, EPI_ISL_417021, EPI_ISL_417022, EPI_ISL_417023, EPI_ISL_417025                                                                                                                                                                                                                                                                                                                                                                                                                                                                                                                                                                                                                                                                                                                                                                                                                                                                                                                                                                                                                                                                                                                                                                                                                                                                                                                                                                                                                                                                                                                                                                                                                                                                                                                                                                                                                                                                                                                                                                                                                                                 | Department of Clinical Microbiology                                    | GIGA Medical Genomics                                                  | Durkin Keith, Artesi Maria, Bontems Sébastien, Boreux Raphaël, Meex Cécile, Melin Pierrette, Hayette Marie-Pierre, Bours Vincent.               |
| see above                                                                                                                                                                                                                                                                                                                                                                                                                                                                                                                                                                                                                                                                                                                                                                                                                                                                                                                                                                                                                                                                                                                                                                                                                                                                                                                                                                                                                                                                                                                                                                                                                                                                                                                                                                                                                                                                                                                                                                                                                                                                                                                                                                                                                                                                                                                                      | KU Leuven, Clinical and Epidemiological Virology                       | KU Leuven, Clinical and Epidemiological Virology                       | Joan Marti-Carreras, Tony Wawina, Bert Vanmechelen, Piet Maes                                                                                   |
| EPI_ISL_417422, EPI_ISL_417424, EPI_ISL_417425, EPI_ISL_417426, EPI_ISL_417427, EPI_ISL_417428, EPI_ISL_417429, EPI_ISL_417430                                                                                                                                                                                                                                                                                                                                                                                                                                                                                                                                                                                                                                                                                                                                                                                                                                                                                                                                                                                                                                                                                                                                                                                                                                                                                                                                                                                                                                                                                                                                                                                                                                                                                                                                                                                                                                                                                                                                                                                                                                                                                                                                                                                                                 | KU Leuven, Clinical and Epidemiological Virology                       | KU Leuven, Clinical and Epidemiological Virology                       | Tony Wawina, Joan Marti-Carreras, Bert Vanmechelen, Piet Maes                                                                                   |
| EPI_ISL_418270                                                                                                                                                                                                                                                                                                                                                                                                                                                                                                                                                                                                                                                                                                                                                                                                                                                                                                                                                                                                                                                                                                                                                                                                                                                                                                                                                                                                                                                                                                                                                                                                                                                                                                                                                                                                                                                                                                                                                                                                                                                                                                                                                                                                                                                                                                                                 | KU Leuven, Clinical and Epidemiological Virology                       | KU Leuven, Clinical and Epidemiological Virology                       | Tony Wawina, Joan Marti-Carreras, Bert Vanmechelen, Piet Maes                                                                                   |
| EPI_ISL_418624, EPI_ISL_418625, EPI_ISL_418626, EPI_ISL_418627, EPI_ISL_418628, EPI_ISL_418629, EPI_ISL_418630, EPI_ISL_418631, EPI_ISL_418632, EPI_ISL_418633, EPI_ISL_418634, EPI_ISL_418635, EPI_ISL_418636, EPI_ISL_418637, EPI_ISL_418638, EPI_ISL_418639, EPI_ISL_418640, EPI_ISL_418645, EPI_ISL_418646, EPI_ISL_418648, EPI_ISL_418649, EPI_ISL_418650, EPI_ISL_418651, EPI_ISL_418652, EPI_ISL_418653, EPI_ISL_418654, EPI_ISL_418655, EPI_ISL_418656, EPI_ISL_418657, EPI_ISL_418658, EPI_ISL_418659, EPI_ISL_418660, EPI_ISL_418661, EPI_ISL_418663, EPI_ISL_418664                                                                                                                                                                                                                                                                                                                                                                                                                                                                                                                                                                                                                                                                                                                                                                                                                                                                                                                                                                                                                                                                                                                                                                                                                                                                                                                                                                                                                                                                                                                                                                                                                                                                                                                                                                 | Department of Clinical Microbiology                                    | GIGA Medical Genomics                                                  | Keith Durkin, Maria Artesi, Sébastien Bontems, Raphaël Boreux, Cécile Meex, Pierrette Melin, Marie-Pierre Hayette, Vincent Bours.               |
| see above                                                                                                                                                                                                                                                                                                                                                                                                                                                                                                                                                                                                                                                                                                                                                                                                                                                                                                                                                                                                                                                                                                                                                                                                                                                                                                                                                                                                                                                                                                                                                                                                                                                                                                                                                                                                                                                                                                                                                                                                                                                                                                                                                                                                                                                                                                                                      | KU Leuven, Clinical and Epidemiological Virology                       | KU Leuven, Clinical and Epidemiological Virology                       | Bert Vanmechelen, Tony Wawina, Joan Marti-Carreras, Piet Maes                                                                                   |
| EPI_ISL_418792, EPI_ISL_418793                                                                                                                                                                                                                                                                                                                                                                                                                                                                                                                                                                                                                                                                                                                                                                                                                                                                                                                                                                                                                                                                                                                                                                                                                                                                                                                                                                                                                                                                                                                                                                                                                                                                                                                                                                                                                                                                                                                                                                                                                                                                                                                                                                                                                                                                                                                 | KU Leuven, Clinical and Epidemiological Virology                       | KU Leuven, Clinical and Epidemiological Virology                       | Bert Vanmechelen, Joan Marti-Carreras, Tony Wawina, Piet Maes                                                                                   |
| EPI_ISL_418794, EPI_ISL_418795, EPI_ISL_418796, EPI_ISL_418797, EPI_ISL_418798, EPI_ISL_418800, EPI_ISL_418805, EPI_ISL_418806, EPI_ISL_418863, EPI_ISL_418981, EPI_ISL_418982, EPI_ISL_418983, EPI_ISL_418984, EPI_ISL_418985, EPI_ISL_418986, EPI_ISL_418987                                                                                                                                                                                                                                                                                                                                                                                                                                                                                                                                                                                                                                                                                                                                                                                                                                                                                                                                                                                                                                                                                                                                                                                                                                                                                                                                                                                                                                                                                                                                                                                                                                                                                                                                                                                                                                                                                                                                                                                                                                                                                 | KU Leuven, Clinical and Epidemiological Virology                       | KU Leuven, Clinical and Epidemiological Virology                       | Bert Vanmechelen, Joan Marti-Carreras, Tony Wawina, Piet Maes                                                                                   |
| see above                                                                                                                                                                                                                                                                                                                                                                                                                                                                                                                                                                                                                                                                                                                                                                                                                                                                                                                                                                                                                                                                                                                                                                                                                                                                                                                                                                                                                                                                                                                                                                                                                                                                                                                                                                                                                                                                                                                                                                                                                                                                                                                                                                                                                                                                                                                                      | Institute information KU Leuven, Clinical and Epidemiological Virology | Institute information KU Leuven, Clinical and Epidemiological Virology | Bert Vanmechelen, Joan Marti-Carreras, Tony Wawina, Piet Maes                                                                                   |
| EPI_ISL_418988                                                                                                                                                                                                                                                                                                                                                                                                                                                                                                                                                                                                                                                                                                                                                                                                                                                                                                                                                                                                                                                                                                                                                                                                                                                                                                                                                                                                                                                                                                                                                                                                                                                                                                                                                                                                                                                                                                                                                                                                                                                                                                                                                                                                                                                                                                                                 | KU Leuven, Clinical and Epidemiological Virology                       | KU Leuven, Clinical and Epidemiological Virology                       | Bert Vanmechelen, Joan Marti-Carreras, Tony Wawina, Piet Maes                                                                                   |
| EPI_ISL_418989                                                                                                                                                                                                                                                                                                                                                                                                                                                                                                                                                                                                                                                                                                                                                                                                                                                                                                                                                                                                                                                                                                                                                                                                                                                                                                                                                                                                                                                                                                                                                                                                                                                                                                                                                                                                                                                                                                                                                                                                                                                                                                                                                                                                                                                                                                                                 | KU Leuven, Clinical and Epidemiological Virology                       | KU Leuven, Clinical and Epidemiological Virology                       | Bert Vanmechelen, Joan Marti-Carreras, Tony Wawina, Piet Maes                                                                                   |
| EPI_ISL_419259                                                                                                                                                                                                                                                                                                                                                                                                                                                                                                                                                                                                                                                                                                                                                                                                                                                                                                                                                                                                                                                                                                                                                                                                                                                                                                                                                                                                                                                                                                                                                                                                                                                                                                                                                                                                                                                                                                                                                                                                                                                                                                                                                                                                                                                                                                                                 | Lab voor klinische biologie                                            | Onderzoeksgroep Virologie                                              | Laurens Lambrechts, Nick Vereecke, Marthe Pauwels, Basiel Cole, Bruno Verhasselt, Linos Vandekerckhove, Hans Nauwynck, Sebastiaan Theuns        |
| EPI_ISL_419264                                                                                                                                                                                                                                                                                                                                                                                                                                                                                                                                                                                                                                                                                                                                                                                                                                                                                                                                                                                                                                                                                                                                                                                                                                                                                                                                                                                                                                                                                                                                                                                                                                                                                                                                                                                                                                                                                                                                                                                                                                                                                                                                                                                                                                                                                                                                 | Lab voor klinische biologie                                            | Onderzoeksgroep Virologie                                              | Nick Vereecke, Laurens Lambrechts, Marthe Pauwels, Basiel Cole, Bruno Verhasselt, Linos Vandekerckhove, Hans Nauwynck, Sebastiaan Theuns        |
| EPI_ISL_419265                                                                                                                                                                                                                                                                                                                                                                                                                                                                                                                                                                                                                                                                                                                                                                                                                                                                                                                                                                                                                                                                                                                                                                                                                                                                                                                                                                                                                                                                                                                                                                                                                                                                                                                                                                                                                                                                                                                                                                                                                                                                                                                                                                                                                                                                                                                                 | Lab voor klinische biologie                                            | Onderzoeksgroep Virologie                                              | Laurens Lambrechts, Nick Vereecke, Marthe Pauwels, Basiel Cole, Bruno Verhasselt, Linos Vandekerckhove, Hans Nauwynck, Sebastiaan Theuns        |
| EPI_ISL_419266                                                                                                                                                                                                                                                                                                                                                                                                                                                                                                                                                                                                                                                                                                                                                                                                                                                                                                                                                                                                                                                                                                                                                                                                                                                                                                                                                                                                                                                                                                                                                                                                                                                                                                                                                                                                                                                                                                                                                                                                                                                                                                                                                                                                                                                                                                                                 | Lab voor klinische biologie                                            | Onderzoeksgroep Virologie                                              | Nick Vereecke, Laurens Lambrechts, Marthe Pauwels, Basiel Cole, Bruno Verhasselt, Linos Vandekerckhove, Hans Nauwynck, Sebastiaan Theuns        |
| EPI_ISL_420314, EPI_ISL_420315, EPI_ISL_420316, EPI_ISL_420317, EPI_ISL_420318, EPI_ISL_420319, EPI_ISL_420320, EPI_ISL_420321, EPI_ISL_420322, EPI_ISL_420323, EPI_ISL_420324, EPI_ISL_420325, EPI_ISL_420326, EPI_ISL_420327, EPI_ISL_420328, EPI_ISL_420329, EPI_ISL_420330, EPI_ISL_420331, EPI_ISL_420332, EPI_ISL_420333, EPI_ISL_420334, EPI_ISL_420335, EPI_ISL_420336, EPI_ISL_420337, EPI_ISL_420338, EPI_ISL_420339, EPI_ISL_420340, EPI_ISL_420341, EPI_ISL_420342, EPI_ISL_420343, EPI_ISL_420344, EPI_ISL_420345, EPI_ISL_420346, EPI_ISL_420347, EPI_ISL_420348, EPI_ISL_420349, EPI_ISL_420350, EPI_ISL_420351, EPI_ISL_420352, EPI_ISL_420353, EPI_ISL_420354, EPI_ISL_420355, EPI_ISL_420356, EPI_ISL_420357, EPI_ISL_420358, EPI_ISL_420359, EPI_ISL_420360, EPI_ISL_420361, EPI_ISL_420362, EPI_ISL_420363, EPI_ISL_420364, EPI_ISL_420365, EPI_ISL_420366, EPI_ISL_420367, EPI_ISL_420368, EPI_ISL_420369, EPI_ISL_420370, EPI_ISL_420371, EPI_ISL_420372, EPI_ISL_420373, EPI_ISL_420374, EPI_ISL_420375, EPI_ISL_420376, EPI_ISL_420377, EPI_ISL_420378, EPI_ISL_420379, EPI_ISL_420380, EPI_ISL_420381, EPI_ISL_420382, EPI_ISL_420383, EPI_ISL_420384, EPI_ISL_420385, EPI_ISL_420386, EPI_ISL_420387, EPI_ISL_420388, EPI_ISL_420389, EPI_ISL_420390, EPI_ISL_420391, EPI_ISL_420392, EPI_ISL_420393, EPI_ISL_420394, EPI_ISL_420395, EPI_ISL_420396, EPI_ISL_420397, EPI_ISL_420398, EPI_ISL_420399, EPI_ISL_420400, EPI_ISL_420401, EPI_ISL_420402, EPI_ISL_420403, EPI_ISL_420404, EPI_ISL_420405, EPI_ISL_420406, EPI_ISL_420407, EPI_ISL_420408, EPI_ISL_420409, EPI_ISL_420410, EPI_ISL_420411, EPI_ISL_420412, EPI_ISL_420413, EPI_ISL_420414, EPI_ISL_420415, EPI_ISL_420416, EPI_ISL_420417, EPI_ISL_420418, EPI_ISL_420419, EPI_ISL_420420, EPI_ISL_420421, EPI_ISL_420422, EPI_ISL_420423, EPI_ISL_420424, EPI_ISL_420425, EPI_ISL_420426, EPI_ISL_420427, EPI_ISL_420428, EPI_ISL_420429, EPI_ISL_420430, EPI_ISL_420431, EPI_ISL_420432, EPI_ISL_420433, EPI_ISL_420434, EPI_ISL_420435, EPI_ISL_420436, EPI_ISL_420437, EPI_ISL_420438, EPI_ISL_420439, EPI_ISL_420440, EPI_ISL_420441, EPI_ISL_420442, EPI_ISL_420443, EPI_ISL_420444, EPI_ISL_420445, EPI_ISL_420446, EPI_ISL_420447, EPI_ISL_420448, EPI_ISL_420449, EPI_ISL_420450, EPI_ISL_420451, EPI_ISL_420452, EPI_ISL_420453, EPI_ISL_420454 | KU Leuven, Clinical and Epidemiological Virology                       | KU Leuven, Clinical and Epidemiological Virology                       | Joan Marti-Carreras, Bert Vanmechelen, Tony Wawina, Piet Maes                                                                                   |
| see above                                                                                                                                                                                                                                                                                                                                                                                                                                                                                                                                                                                                                                                                                                                                                                                                                                                                                                                                                                                                                                                                                                                                                                                                                                                                                                                                                                                                                                                                                                                                                                                                                                                                                                                                                                                                                                                                                                                                                                                                                                                                                                                                                                                                                                                                                                                                      | KU Leuven, Clinical and Epidemiological Virology                       | KU Leuven, Clinical and Epidemiological Virology                       | Joan Marti-Carreras, Bert Vanmechelen, Tony Wawina, Piet Maes                                                                                   |
| EPI_ISL_421182, EPI_ISL_421183, EPI_ISL_421184, EPI_ISL_421185, EPI_ISL_421186, EPI_ISL_421187, EPI_ISL_421188, EPI_ISL_421189, EPI_ISL_421190, EPI_ISL_421191, EPI_ISL_421192, EPI_ISL_421193, EPI_ISL_421194, EPI_ISL_421195, EPI_ISL_421196, EPI_ISL_421198, EPI_ISL_421200, EPI_ISL_421201, EPI_ISL_421202, EPI_ISL_421203, EPI_ISL_421204, EPI_ISL_421205, EPI_ISL_421206, EPI_ISL_421207, EPI_ISL_421210, EPI_ISL_421212, EPI_ISL_421213, EPI_ISL_421214, EPI_ISL_424629, EPI_ISL_424630, EPI_ISL_424631, EPI_ISL_424633, EPI_ISL_424637, EPI_ISL_424640, EPI_ISL_424641, EPI_ISL_424642, EPI_ISL_424643, EPI_ISL_424644, EPI_ISL_424645, EPI_ISL_424646, EPI_ISL_424647, EPI_ISL_424649, EPI_ISL_424650, EPI_ISL_424651, EPI_ISL_424652, EPI_ISL_424653, EPI_ISL_424654, EPI_ISL_424655, EPI_ISL_424657, EPI_ISL_424658, EPI_ISL_424660, EPI_ISL_424661, EPI_ISL_424662, EPI_ISL_424664                                                                                                                                                                                                                                                                                                                                                                                                                                                                                                                                                                                                                                                                                                                                                                                                                                                                                                                                                                                                                                                                                                                                                                                                                                                                                                                                                                                                                                                 | Department of Clinical Microbiology                                    | GIGA Medical Genomics                                                  | Keith Durkin, Maria Artesi, Sébastien Bontems, Raphaël Boreux, Cécile Meex, Pierrette Melin, Marie-Pierre Hayette, Vincent Bours.               |
| see above                                                                                                                                                                                                                                                                                                                                                                                                                                                                                                                                                                                                                                                                                                                                                                                                                                                                                                                                                                                                                                                                                                                                                                                                                                                                                                                                                                                                                                                                                                                                                                                                                                                                                                                                                                                                                                                                                                                                                                                                                                                                                                                                                                                                                                                                                                                                      | Lab voor klinische biologie                                            | Onderzoeksgroep Virologie                                              | Laurens Lambrechts, Nick Vereecke, Marthe Pauwels, Basiel Cole, Bruno Verhasselt, Linos Vandekerckhove, Hans Nauwynck, Sebastiaan Theuns        |
| EPI_ISL_425048, EPI_ISL_425050                                                                                                                                                                                                                                                                                                                                                                                                                                                                                                                                                                                                                                                                                                                                                                                                                                                                                                                                                                                                                                                                                                                                                                                                                                                                                                                                                                                                                                                                                                                                                                                                                                                                                                                                                                                                                                                                                                                                                                                                                                                                                                                                                                                                                                                                                                                 | Lab voor klinische biologie                                            | Onderzoeksgroep Virologie                                              | Nick Vereecke, Laurens Lambrechts, Marthe Pauwels, Basiel Cole, Bruno Verhasselt, Linos Vandekerckhove, Hans Nauwynck, Sebastiaan Theuns        |
| EPI_ISL_425052, EPI_ISL_425053, EPI_ISL_425054, EPI_ISL_425055                                                                                                                                                                                                                                                                                                                                                                                                                                                                                                                                                                                                                                                                                                                                                                                                                                                                                                                                                                                                                                                                                                                                                                                                                                                                                                                                                                                                                                                                                                                                                                                                                                                                                                                                                                                                                                                                                                                                                                                                                                                                                                                                                                                                                                                                                 | Lab voor klinische biologie                                            | Onderzoeksgroep Virologie                                              | Nick Vereecke, Laurens Lambrechts, Marthe Pauwels, Basiel Cole, Bruno Verhasselt, Linos Vandekerckhove, Hans Nauwynck, Sebastiaan Theuns        |
| EPI_ISL_425056, EPI_ISL_425057, EPI_ISL_425058                                                                                                                                                                                                                                                                                                                                                                                                                                                                                                                                                                                                                                                                                                                                                                                                                                                                                                                                                                                                                                                                                                                                                                                                                                                                                                                                                                                                                                                                                                                                                                                                                                                                                                                                                                                                                                                                                                                                                                                                                                                                                                                                                                                                                                                                                                 | Lab voor klinische biologie                                            | Onderzoeksgroep Virologie                                              | Laurens Lambrechts, Nick Vereecke, Marthe Pauwels, Basiel Cole, Bruno Verhasselt, Linos Vandekerckhove, Hans Nauwynck, Sebastiaan Theuns        |
| EPI_ISL_425059, EPI_ISL_425060, EPI_ISL_425061                                                                                                                                                                                                                                                                                                                                                                                                                                                                                                                                                                                                                                                                                                                                                                                                                                                                                                                                                                                                                                                                                                                                                                                                                                                                                                                                                                                                                                                                                                                                                                                                                                                                                                                                                                                                                                                                                                                                                                                                                                                                                                                                                                                                                                                                                                 | Lab voor klinische biologie                                            | Onderzoeksgroep Virologie                                              | Nick Vereecke, Laurens Lambrechts, Marthe Pauwels, Basiel Cole, Bruno Verhasselt, Linos Vandekerckhove, Hans Nauwynck, Sebastiaan Theuns        |
| EPI_ISL_425062, EPI_ISL_425063, EPI_ISL_425064                                                                                                                                                                                                                                                                                                                                                                                                                                                                                                                                                                                                                                                                                                                                                                                                                                                                                                                                                                                                                                                                                                                                                                                                                                                                                                                                                                                                                                                                                                                                                                                                                                                                                                                                                                                                                                                                                                                                                                                                                                                                                                                                                                                                                                                                                                 | Lab voor klinische biologie                                            | Onderzoeksgroep Virologie                                              | Laurens Lambrechts, Nick Vereecke, Marthe Pauwels, Jozefien De Clercq, Bruno Verhasselt, Linos Vandekerckhove, Hans Nauwynck, Sebastiaan Theuns |



|                                                                                                                                                                                                                                                                                                                                                                                                                                                                                                                                                                                                                                                                                                                                                                                                                                                                                                                                                                                                                                                                                                                                                                                                                                                                                                                                                                                                                                                                                                                                                                                                                                                                                                                                                                                                                                                                                                                                                                                                                                                                                                                                                                                                                                                                                                                                                                                                                                                                                                                                                                                                                                                                                                                                                                                                                                                                                                                                                                                                                                                                                                                                                                                                                                                                                                                                                                                                                                                                                                                                                                                                                                                                                                                                                                                                                                                                                                                                                                                                                                                                                                                                                                                                                                                                                                                                                                                                                                                                                                                                                                                                                                                                                                                                                                                                                                                                                                                                                                                                                                                                                                                                                                                                                                                                                                                                                                                                                                |                                                                                                  |                                                                  |                                                                                                                                                                                                                                                                          |
|--------------------------------------------------------------------------------------------------------------------------------------------------------------------------------------------------------------------------------------------------------------------------------------------------------------------------------------------------------------------------------------------------------------------------------------------------------------------------------------------------------------------------------------------------------------------------------------------------------------------------------------------------------------------------------------------------------------------------------------------------------------------------------------------------------------------------------------------------------------------------------------------------------------------------------------------------------------------------------------------------------------------------------------------------------------------------------------------------------------------------------------------------------------------------------------------------------------------------------------------------------------------------------------------------------------------------------------------------------------------------------------------------------------------------------------------------------------------------------------------------------------------------------------------------------------------------------------------------------------------------------------------------------------------------------------------------------------------------------------------------------------------------------------------------------------------------------------------------------------------------------------------------------------------------------------------------------------------------------------------------------------------------------------------------------------------------------------------------------------------------------------------------------------------------------------------------------------------------------------------------------------------------------------------------------------------------------------------------------------------------------------------------------------------------------------------------------------------------------------------------------------------------------------------------------------------------------------------------------------------------------------------------------------------------------------------------------------------------------------------------------------------------------------------------------------------------------------------------------------------------------------------------------------------------------------------------------------------------------------------------------------------------------------------------------------------------------------------------------------------------------------------------------------------------------------------------------------------------------------------------------------------------------------------------------------------------------------------------------------------------------------------------------------------------------------------------------------------------------------------------------------------------------------------------------------------------------------------------------------------------------------------------------------------------------------------------------------------------------------------------------------------------------------------------------------------------------------------------------------------------------------------------------------------------------------------------------------------------------------------------------------------------------------------------------------------------------------------------------------------------------------------------------------------------------------------------------------------------------------------------------------------------------------------------------------------------------------------------------------------------------------------------------------------------------------------------------------------------------------------------------------------------------------------------------------------------------------------------------------------------------------------------------------------------------------------------------------------------------------------------------------------------------------------------------------------------------------------------------------------------------------------------------------------------------------------------------------------------------------------------------------------------------------------------------------------------------------------------------------------------------------------------------------------------------------------------------------------------------------------------------------------------------------------------------------------------------------------------------------------------------------------------------------------------------|--------------------------------------------------------------------------------------------------|------------------------------------------------------------------|--------------------------------------------------------------------------------------------------------------------------------------------------------------------------------------------------------------------------------------------------------------------------|
| see above                                                                                                                                                                                                                                                                                                                                                                                                                                                                                                                                                                                                                                                                                                                                                                                                                                                                                                                                                                                                                                                                                                                                                                                                                                                                                                                                                                                                                                                                                                                                                                                                                                                                                                                                                                                                                                                                                                                                                                                                                                                                                                                                                                                                                                                                                                                                                                                                                                                                                                                                                                                                                                                                                                                                                                                                                                                                                                                                                                                                                                                                                                                                                                                                                                                                                                                                                                                                                                                                                                                                                                                                                                                                                                                                                                                                                                                                                                                                                                                                                                                                                                                                                                                                                                                                                                                                                                                                                                                                                                                                                                                                                                                                                                                                                                                                                                                                                                                                                                                                                                                                                                                                                                                                                                                                                                                                                                                                                      | KU Leuven, Rega Institute, Clinical and Epidemiological Virology                                 | KU Leuven, Rega Institute, Clinical and Epidemiological Virology | Tony Wawina-Bokalanga, Joan Marti-Carerras, Bert Vanmechelen, Piet Maes                                                                                                                                                                                                  |
| EPI_ISL_481221, EPI_ISL_481222, EPI_ISL_481224, EPI_ISL_481225                                                                                                                                                                                                                                                                                                                                                                                                                                                                                                                                                                                                                                                                                                                                                                                                                                                                                                                                                                                                                                                                                                                                                                                                                                                                                                                                                                                                                                                                                                                                                                                                                                                                                                                                                                                                                                                                                                                                                                                                                                                                                                                                                                                                                                                                                                                                                                                                                                                                                                                                                                                                                                                                                                                                                                                                                                                                                                                                                                                                                                                                                                                                                                                                                                                                                                                                                                                                                                                                                                                                                                                                                                                                                                                                                                                                                                                                                                                                                                                                                                                                                                                                                                                                                                                                                                                                                                                                                                                                                                                                                                                                                                                                                                                                                                                                                                                                                                                                                                                                                                                                                                                                                                                                                                                                                                                                                                 | Lab voor klinische biologie                                                                      | Onderzoeksgroep Virologie                                        | Laurens Lambrechts, Nick Vereecke, Marthe Pauwels, Bruno Verhasselt, Linos Vandekerckhove, Hans Nauwynck, Sebastiaan Theuns                                                                                                                                              |
| EPI_ISL_481227, EPI_ISL_481229, EPI_ISL_481230, EPI_ISL_481231, EPI_ISL_481232, EPI_ISL_481233                                                                                                                                                                                                                                                                                                                                                                                                                                                                                                                                                                                                                                                                                                                                                                                                                                                                                                                                                                                                                                                                                                                                                                                                                                                                                                                                                                                                                                                                                                                                                                                                                                                                                                                                                                                                                                                                                                                                                                                                                                                                                                                                                                                                                                                                                                                                                                                                                                                                                                                                                                                                                                                                                                                                                                                                                                                                                                                                                                                                                                                                                                                                                                                                                                                                                                                                                                                                                                                                                                                                                                                                                                                                                                                                                                                                                                                                                                                                                                                                                                                                                                                                                                                                                                                                                                                                                                                                                                                                                                                                                                                                                                                                                                                                                                                                                                                                                                                                                                                                                                                                                                                                                                                                                                                                                                                                 | Lab voor klinische biologie                                                                      | Onderzoeksgroep Virologie                                        | Nick Vereecke, Laurens Lambrechts, Marthe Pauwels, Bruno Verhasselt, Linos Vandekerckhove, Hans Nauwynck, Sebastiaan Theuns                                                                                                                                              |
| EPI_ISL_484697, EPI_ISL_484698, EPI_ISL_484699, EPI_ISL_484700, EPI_ISL_484702, EPI_ISL_484703                                                                                                                                                                                                                                                                                                                                                                                                                                                                                                                                                                                                                                                                                                                                                                                                                                                                                                                                                                                                                                                                                                                                                                                                                                                                                                                                                                                                                                                                                                                                                                                                                                                                                                                                                                                                                                                                                                                                                                                                                                                                                                                                                                                                                                                                                                                                                                                                                                                                                                                                                                                                                                                                                                                                                                                                                                                                                                                                                                                                                                                                                                                                                                                                                                                                                                                                                                                                                                                                                                                                                                                                                                                                                                                                                                                                                                                                                                                                                                                                                                                                                                                                                                                                                                                                                                                                                                                                                                                                                                                                                                                                                                                                                                                                                                                                                                                                                                                                                                                                                                                                                                                                                                                                                                                                                                                                 | Department of Clinical Microbiology                                                              | GIGA Medical Genomics                                            | Keith Durkin, Maria Artesi, Sébastien Bontems, Raphaël Boreux, Cécile Meex, Axelle Chaslain, Céline Fombellida-Lopez, Pierrette Melin, Marie-Pierre Hayette, Vincent Bours.                                                                                              |
| EPI_ISL_487432, EPI_ISL_487433, EPI_ISL_487434, EPI_ISL_487435, EPI_ISL_487436                                                                                                                                                                                                                                                                                                                                                                                                                                                                                                                                                                                                                                                                                                                                                                                                                                                                                                                                                                                                                                                                                                                                                                                                                                                                                                                                                                                                                                                                                                                                                                                                                                                                                                                                                                                                                                                                                                                                                                                                                                                                                                                                                                                                                                                                                                                                                                                                                                                                                                                                                                                                                                                                                                                                                                                                                                                                                                                                                                                                                                                                                                                                                                                                                                                                                                                                                                                                                                                                                                                                                                                                                                                                                                                                                                                                                                                                                                                                                                                                                                                                                                                                                                                                                                                                                                                                                                                                                                                                                                                                                                                                                                                                                                                                                                                                                                                                                                                                                                                                                                                                                                                                                                                                                                                                                                                                                 | Queen Astrid Military Hospital                                                                   | Institute of Tropical Medicine                                   | Philippe Selhorst, Colin Anthony                                                                                                                                                                                                                                         |
| EPI_ISL_498127, EPI_ISL_498128, EPI_ISL_498129, EPI_ISL_498130, EPI_ISL_498131, EPI_ISL_498132, EPI_ISL_498133, EPI_ISL_498134, EPI_ISL_498135, EPI_ISL_498136, EPI_ISL_498137, EPI_ISL_498138, EPI_ISL_498139, EPI_ISL_498141, EPI_ISL_498143, EPI_ISL_498144, EPI_ISL_498146, EPI_ISL_498628, EPI_ISL_498629                                                                                                                                                                                                                                                                                                                                                                                                                                                                                                                                                                                                                                                                                                                                                                                                                                                                                                                                                                                                                                                                                                                                                                                                                                                                                                                                                                                                                                                                                                                                                                                                                                                                                                                                                                                                                                                                                                                                                                                                                                                                                                                                                                                                                                                                                                                                                                                                                                                                                                                                                                                                                                                                                                                                                                                                                                                                                                                                                                                                                                                                                                                                                                                                                                                                                                                                                                                                                                                                                                                                                                                                                                                                                                                                                                                                                                                                                                                                                                                                                                                                                                                                                                                                                                                                                                                                                                                                                                                                                                                                                                                                                                                                                                                                                                                                                                                                                                                                                                                                                                                                                                                 | Department of Clinical Microbiology                                                              | GIGA Medical Genomics                                            | Keith Durkin, Maria Artesi, Sébastien Bontems, Raphaël Boreux, Cécile Meex, Axelle Chaslain, Céline Fombellida-Lopez, Pierrette Melin, Marie-Pierre Hayette, Vincent Bours.                                                                                              |
| see above                                                                                                                                                                                                                                                                                                                                                                                                                                                                                                                                                                                                                                                                                                                                                                                                                                                                                                                                                                                                                                                                                                                                                                                                                                                                                                                                                                                                                                                                                                                                                                                                                                                                                                                                                                                                                                                                                                                                                                                                                                                                                                                                                                                                                                                                                                                                                                                                                                                                                                                                                                                                                                                                                                                                                                                                                                                                                                                                                                                                                                                                                                                                                                                                                                                                                                                                                                                                                                                                                                                                                                                                                                                                                                                                                                                                                                                                                                                                                                                                                                                                                                                                                                                                                                                                                                                                                                                                                                                                                                                                                                                                                                                                                                                                                                                                                                                                                                                                                                                                                                                                                                                                                                                                                                                                                                                                                                                                                      | Department of Clinical Microbiology                                                              | GIGA Medical Genomics                                            | Keith Durkin, Maria Artesi, Sébastien Bontems, Raphaël Boreux, Cécile Meex, Axelle Chaslain, Céline Fombellida-Lopez, Pierrette Melin, Marie-Pierre Hayette, Vincent Bours.                                                                                              |
| EPI_ISL_522349, EPI_ISL_522350                                                                                                                                                                                                                                                                                                                                                                                                                                                                                                                                                                                                                                                                                                                                                                                                                                                                                                                                                                                                                                                                                                                                                                                                                                                                                                                                                                                                                                                                                                                                                                                                                                                                                                                                                                                                                                                                                                                                                                                                                                                                                                                                                                                                                                                                                                                                                                                                                                                                                                                                                                                                                                                                                                                                                                                                                                                                                                                                                                                                                                                                                                                                                                                                                                                                                                                                                                                                                                                                                                                                                                                                                                                                                                                                                                                                                                                                                                                                                                                                                                                                                                                                                                                                                                                                                                                                                                                                                                                                                                                                                                                                                                                                                                                                                                                                                                                                                                                                                                                                                                                                                                                                                                                                                                                                                                                                                                                                 | KU Leuven, Rega Institute, Clinical and Epidemiological Virology                                 | KU Leuven, Rega Institute, Clinical and Epidemiological Virology | Tony Wawina-Bokalanga, Joan Marti-Carerras, Bert Vanmechelen, Piet Maes                                                                                                                                                                                                  |
| EPI_ISL_577743, EPI_ISL_577744, EPI_ISL_577746                                                                                                                                                                                                                                                                                                                                                                                                                                                                                                                                                                                                                                                                                                                                                                                                                                                                                                                                                                                                                                                                                                                                                                                                                                                                                                                                                                                                                                                                                                                                                                                                                                                                                                                                                                                                                                                                                                                                                                                                                                                                                                                                                                                                                                                                                                                                                                                                                                                                                                                                                                                                                                                                                                                                                                                                                                                                                                                                                                                                                                                                                                                                                                                                                                                                                                                                                                                                                                                                                                                                                                                                                                                                                                                                                                                                                                                                                                                                                                                                                                                                                                                                                                                                                                                                                                                                                                                                                                                                                                                                                                                                                                                                                                                                                                                                                                                                                                                                                                                                                                                                                                                                                                                                                                                                                                                                                                                 | Dutch COVID-19 response team                                                                     | Erasmus Medical Center                                           | Bas Oude Munnink, Reina Sikkema, David Nieuwenhuijse, Irina Chestakova, Anne van der Linden, Marjan Boter, Emmanuelle Munger, Corine GeurtsvanKessel, Annemiek van der Eijk, Richard Molenkamp, Marion Koopmans, on behalf of the Dutch national COVID-19 response team. |
| EPI_ISL_582127                                                                                                                                                                                                                                                                                                                                                                                                                                                                                                                                                                                                                                                                                                                                                                                                                                                                                                                                                                                                                                                                                                                                                                                                                                                                                                                                                                                                                                                                                                                                                                                                                                                                                                                                                                                                                                                                                                                                                                                                                                                                                                                                                                                                                                                                                                                                                                                                                                                                                                                                                                                                                                                                                                                                                                                                                                                                                                                                                                                                                                                                                                                                                                                                                                                                                                                                                                                                                                                                                                                                                                                                                                                                                                                                                                                                                                                                                                                                                                                                                                                                                                                                                                                                                                                                                                                                                                                                                                                                                                                                                                                                                                                                                                                                                                                                                                                                                                                                                                                                                                                                                                                                                                                                                                                                                                                                                                                                                 | Antwerp University Hospital                                                                      | Institute of Tropical Medicine                                   | Philippe Selhorst, Colin Anthony                                                                                                                                                                                                                                         |
| EPI_ISL_634878                                                                                                                                                                                                                                                                                                                                                                                                                                                                                                                                                                                                                                                                                                                                                                                                                                                                                                                                                                                                                                                                                                                                                                                                                                                                                                                                                                                                                                                                                                                                                                                                                                                                                                                                                                                                                                                                                                                                                                                                                                                                                                                                                                                                                                                                                                                                                                                                                                                                                                                                                                                                                                                                                                                                                                                                                                                                                                                                                                                                                                                                                                                                                                                                                                                                                                                                                                                                                                                                                                                                                                                                                                                                                                                                                                                                                                                                                                                                                                                                                                                                                                                                                                                                                                                                                                                                                                                                                                                                                                                                                                                                                                                                                                                                                                                                                                                                                                                                                                                                                                                                                                                                                                                                                                                                                                                                                                                                                 | Lab voor klinische biologie                                                                      | Onderzoeksgroep Virologie                                        | Laurens Lambrechts, Nick Vereecke, Marthe Pauwels, Bruno Verhasselt, Linos Vandekerckhove, Hans Nauwynck, Sebastiaan Theuns                                                                                                                                              |
| EPI_ISL_649154                                                                                                                                                                                                                                                                                                                                                                                                                                                                                                                                                                                                                                                                                                                                                                                                                                                                                                                                                                                                                                                                                                                                                                                                                                                                                                                                                                                                                                                                                                                                                                                                                                                                                                                                                                                                                                                                                                                                                                                                                                                                                                                                                                                                                                                                                                                                                                                                                                                                                                                                                                                                                                                                                                                                                                                                                                                                                                                                                                                                                                                                                                                                                                                                                                                                                                                                                                                                                                                                                                                                                                                                                                                                                                                                                                                                                                                                                                                                                                                                                                                                                                                                                                                                                                                                                                                                                                                                                                                                                                                                                                                                                                                                                                                                                                                                                                                                                                                                                                                                                                                                                                                                                                                                                                                                                                                                                                                                                 | Queen Astrid Military Hospital                                                                   | Institute of Tropical Medicine                                   | Philippe Selhorst, Colin Anthony                                                                                                                                                                                                                                         |
| EPI_ISL_734492, EPI_ISL_734493, EPI_ISL_734503, EPI_ISL_734504, EPI_ISL_734505, EPI_ISL_734506, EPI_ISL_734507, EPI_ISL_734508, EPI_ISL_734509, EPI_ISL_734510, EPI_ISL_734511, EPI_ISL_734512, EPI_ISL_734513, EPI_ISL_734514, EPI_ISL_734515, EPI_ISL_734516, EPI_ISL_734517, EPI_ISL_734518, EPI_ISL_734519, EPI_ISL_734520, EPI_ISL_734521, EPI_ISL_734522, EPI_ISL_734523, EPI_ISL_734524, EPI_ISL_734525, EPI_ISL_734526, EPI_ISL_734527, EPI_ISL_734528, EPI_ISL_734529, EPI_ISL_734530, EPI_ISL_734531, EPI_ISL_734532, EPI_ISL_734533, EPI_ISL_734534, EPI_ISL_734535, EPI_ISL_734536, EPI_ISL_734537, EPI_ISL_734538, EPI_ISL_734539, EPI_ISL_734540, EPI_ISL_734541, EPI_ISL_734542, EPI_ISL_734543, EPI_ISL_734544, EPI_ISL_734545, EPI_ISL_734546, EPI_ISL_734547, EPI_ISL_734548, EPI_ISL_734549, EPI_ISL_734550, EPI_ISL_734551, EPI_ISL_734552, EPI_ISL_734553, EPI_ISL_734554, EPI_ISL_734555, EPI_ISL_734556, EPI_ISL_734557, EPI_ISL_734558, EPI_ISL_734559, EPI_ISL_734560, EPI_ISL_734561, EPI_ISL_734562, EPI_ISL_734563, EPI_ISL_734564, EPI_ISL_734565, EPI_ISL_734566, EPI_ISL_734567, EPI_ISL_734568, EPI_ISL_734569, EPI_ISL_734570, EPI_ISL_734571, EPI_ISL_734572, EPI_ISL_734573, EPI_ISL_734574, EPI_ISL_734575, EPI_ISL_734576, EPI_ISL_734577, EPI_ISL_734578, EPI_ISL_734579, EPI_ISL_734580, EPI_ISL_734581, EPI_ISL_734582, EPI_ISL_734583, EPI_ISL_734584, EPI_ISL_734585, EPI_ISL_734586, EPI_ISL_734587, EPI_ISL_734588, EPI_ISL_734589, EPI_ISL_734590, EPI_ISL_734591, EPI_ISL_734592, EPI_ISL_734593, EPI_ISL_734594, EPI_ISL_734595, EPI_ISL_734596, EPI_ISL_734597, EPI_ISL_734598, EPI_ISL_734599, EPI_ISL_734600, EPI_ISL_734601, EPI_ISL_734602, EPI_ISL_734603, EPI_ISL_734604, EPI_ISL_734605, EPI_ISL_734606, EPI_ISL_734607, EPI_ISL_734608, EPI_ISL_734609, EPI_ISL_734610, EPI_ISL_734611, EPI_ISL_734612, EPI_ISL_734613, EPI_ISL_734614, EPI_ISL_734615, EPI_ISL_734616, EPI_ISL_734617, EPI_ISL_734618, EPI_ISL_734619, EPI_ISL_734620, EPI_ISL_734621, EPI_ISL_734622, EPI_ISL_734623, EPI_ISL_734624, EPI_ISL_734625, EPI_ISL_734626, EPI_ISL_734627, EPI_ISL_734628, EPI_ISL_734629, EPI_ISL_734630, EPI_ISL_734631, EPI_ISL_734632, EPI_ISL_734633, EPI_ISL_734634, EPI_ISL_734635, EPI_ISL_734636, EPI_ISL_734637, EPI_ISL_734638, EPI_ISL_734639, EPI_ISL_734640, EPI_ISL_734641, EPI_ISL_734642, EPI_ISL_734643, EPI_ISL_734644, EPI_ISL_734645, EPI_ISL_734646, EPI_ISL_734647, EPI_ISL_734648, EPI_ISL_734649, EPI_ISL_734650, EPI_ISL_734651, EPI_ISL_734652, EPI_ISL_734653, EPI_ISL_734654, EPI_ISL_734655, EPI_ISL_734656, EPI_ISL_734657, EPI_ISL_734658, EPI_ISL_734659, EPI_ISL_734660, EPI_ISL_734661, EPI_ISL_734662, EPI_ISL_734663, EPI_ISL_734664, EPI_ISL_734665, EPI_ISL_734666, EPI_ISL_734667, EPI_ISL_734668, EPI_ISL_734669, EPI_ISL_734670, EPI_ISL_734671, EPI_ISL_734672, EPI_ISL_734673, EPI_ISL_734674, EPI_ISL_734675, EPI_ISL_734676, EPI_ISL_734677, EPI_ISL_734678, EPI_ISL_734679, EPI_ISL_734680, EPI_ISL_734681, EPI_ISL_734682, EPI_ISL_734683, EPI_ISL_734684, EPI_ISL_734685, EPI_ISL_734686, EPI_ISL_734687, EPI_ISL_734688, EPI_ISL_734689, EPI_ISL_734690, EPI_ISL_734691, EPI_ISL_734692, EPI_ISL_734693, EPI_ISL_734694, EPI_ISL_734695, EPI_ISL_734696, EPI_ISL_734697, EPI_ISL_734698, EPI_ISL_734699, EPI_ISL_734700, EPI_ISL_734701, EPI_ISL_734702, EPI_ISL_734703, EPI_ISL_734704, EPI_ISL_734705, EPI_ISL_734706, EPI_ISL_734707, EPI_ISL_734708, EPI_ISL_734709, EPI_ISL_734710, EPI_ISL_734711, EPI_ISL_734712, EPI_ISL_734713, EPI_ISL_734714, EPI_ISL_734715, EPI_ISL_734716, EPI_ISL_734717, EPI_ISL_734718, EPI_ISL_734719, EPI_ISL_734720, EPI_ISL_734721, EPI_ISL_734722, EPI_ISL_734723, EPI_ISL_734724, EPI_ISL_734725, EPI_ISL_734726, EPI_ISL_734727, EPI_ISL_734728, EPI_ISL_734729, EPI_ISL_734730, EPI_ISL_734731, EPI_ISL_734732, EPI_ISL_734733, EPI_ISL_734734, EPI_ISL_734735, EPI_ISL_734736, EPI_ISL_734737, EPI_ISL_734738, EPI_ISL_734739, EPI_ISL_734740, EPI_ISL_734741, EPI_ISL_734742, EPI_ISL_734743, EPI_ISL_734744, EPI_ISL_734745, EPI_ISL_734746, EPI_ISL_734747, EPI_ISL_734748, EPI_ISL_734749, EPI_ISL_734750, EPI_ISL_734751, EPI_ISL_734752, EPI_ISL_734753, EPI_ISL_734754, EPI_ISL_734755, EPI_ISL_734756, EPI_ISL_734757, EPI_ISL_734758, EPI_ISL_734759, EPI_ISL_734760, EPI_ISL_734761, EPI_ISL_734762, EPI_ISL_734763, EPI_ISL_734764, EPI_ISL_734765, EPI_ISL_734766, EPI_ISL_734767, EPI_ISL_734768, EPI_ISL_734769, EPI_ISL_734770, EPI_ISL_734771, EPI_ISL_734772, EPI_ISL_734773, EPI_ISL_734774, EPI_ISL_734775, EPI_ISL_734776, EPI_ISL_734777, EPI_ISL_734778, EPI_ISL_734779, EPI_ISL_734780, EPI_ISL_734781, EPI_ISL_734782, EPI_ISL_734783, EPI_ISL_734784, EPI_ISL_734785, EPI_ISL_734786, EPI_ISL_734787, EPI_ISL_734788, EPI_ISL_734789, EPI_ISL_734790, EPI_ISL_734791, EPI_ISL_734792, EPI_ISL_734793, EPI_ISL_734794, EPI_ISL_734795, EPI_ISL_734796, EPI_ISL_734797, EPI_ISL_734798, EPI_ISL_734799, EPI_ISL_734800, EPI_ISL_735249, EPI_ISL_738196, EPI_ISL_738197, EPI_ISL_738198, EPI_ISL_738199, EPI_ISL_738200, EPI_ISL_738201, EPI_ISL_738202, EPI_ISL_738203, EPI_ISL_738204, EPI_ISL_738205, EPI_ISL_738206, EPI_ISL_738207, EPI_ISL_738208, EPI_ISL_738209, EPI_ISL_738210, EPI_ISL_738211, EPI_ISL_738212, EPI_ISL_738213, EPI_ISL_738214, EPI_ISL_738215, EPI_ISL_738216, EPI_ISL_738217, EPI_ISL_738218, EPI_ISL_738219, EPI_ISL_738220 | UZ Leuven, National Reference Laboratory for Coronaviruses, Laboratory Medicine, Leuven, Belgium | KU Leuven, Rega Institute, Clinical and Epidemiological Virology | Tony Wawina-Bokalanga, Joan Marti-Carerras, Bert Vanmechelen, Piet Maes                                                                                                                                                                                                  |
| EPI_ISL_949244, EPI_ISL_949245, EPI_ISL_949246, EPI_ISL_949247                                                                                                                                                                                                                                                                                                                                                                                                                                                                                                                                                                                                                                                                                                                                                                                                                                                                                                                                                                                                                                                                                                                                                                                                                                                                                                                                                                                                                                                                                                                                                                                                                                                                                                                                                                                                                                                                                                                                                                                                                                                                                                                                                                                                                                                                                                                                                                                                                                                                                                                                                                                                                                                                                                                                                                                                                                                                                                                                                                                                                                                                                                                                                                                                                                                                                                                                                                                                                                                                                                                                                                                                                                                                                                                                                                                                                                                                                                                                                                                                                                                                                                                                                                                                                                                                                                                                                                                                                                                                                                                                                                                                                                                                                                                                                                                                                                                                                                                                                                                                                                                                                                                                                                                                                                                                                                                                                                 | Cliniques universitaires Saint-Luc                                                               | UCLouvain/IREC/MBLG                                              | Jean Ruelle, Lysa Pinsmaye, Benoit Kabamba Mukadi                                                                                                                                                                                                                        |
| EPI_ISL_949248                                                                                                                                                                                                                                                                                                                                                                                                                                                                                                                                                                                                                                                                                                                                                                                                                                                                                                                                                                                                                                                                                                                                                                                                                                                                                                                                                                                                                                                                                                                                                                                                                                                                                                                                                                                                                                                                                                                                                                                                                                                                                                                                                                                                                                                                                                                                                                                                                                                                                                                                                                                                                                                                                                                                                                                                                                                                                                                                                                                                                                                                                                                                                                                                                                                                                                                                                                                                                                                                                                                                                                                                                                                                                                                                                                                                                                                                                                                                                                                                                                                                                                                                                                                                                                                                                                                                                                                                                                                                                                                                                                                                                                                                                                                                                                                                                                                                                                                                                                                                                                                                                                                                                                                                                                                                                                                                                                                                                 | Cliniques Saint-Pierre Ottignies                                                                 | UCLouvain/IREC/MBLG                                              | Jean Ruelle, Lysa Pinsmaye, Benoit Kabamba Mukadi                                                                                                                                                                                                                        |
| EPI_ISL_949249, EPI_ISL_949250, EPI_ISL_949252                                                                                                                                                                                                                                                                                                                                                                                                                                                                                                                                                                                                                                                                                                                                                                                                                                                                                                                                                                                                                                                                                                                                                                                                                                                                                                                                                                                                                                                                                                                                                                                                                                                                                                                                                                                                                                                                                                                                                                                                                                                                                                                                                                                                                                                                                                                                                                                                                                                                                                                                                                                                                                                                                                                                                                                                                                                                                                                                                                                                                                                                                                                                                                                                                                                                                                                                                                                                                                                                                                                                                                                                                                                                                                                                                                                                                                                                                                                                                                                                                                                                                                                                                                                                                                                                                                                                                                                                                                                                                                                                                                                                                                                                                                                                                                                                                                                                                                                                                                                                                                                                                                                                                                                                                                                                                                                                                                                 | Cliniques universitaires Saint-Luc                                                               | UCLouvain/IREC/MBLG                                              | Jean Ruelle, Lysa Pinsmaye, Benoit Kabamba Mukadi                                                                                                                                                                                                                        |

**Table S6. GISAID references used to generate the circular maximum-likelihood phylogenetic tree.**
